# Supplementary material for: Non-symmetrical aryl- and arylethynyl-substituted thioalkyl-porphyrazines for optoelectronic materials: synthesis, properties, and computational studies
Source: Royal Society of Chemistry journal article supplement (doi:10.1039/c4dt03317e), 2014-11-19
Supplement: c4dt03317e1.pdf [file c4dt03317e1.pdf]

# Electronic Supplementary Information

## Non-symmetrical aryl- and arylolethynyl-substituted thio- porphyrazines for electronic materials: Synthesis, properties, and computational studies.

Sandra Belviso<sup>a,b\*</sup>, Mario Amati<sup>a,b</sup>, Rocco Rossano<sup>a</sup>, Alessandra Crispini<sup>c</sup> and Francesco Leij<sup>a,b\*</sup>

<sup>a</sup>*Università della Basilicata, Dipartimento di Scienze, via dell'Ateneo Lucano, 10; 85100 Potenza, ITALY.*

<sup>b</sup>*LASCAMM, CR-INSTM Unità della Basilicata and La.M.I.*

<sup>c</sup>*Centro di Eccellenza CEMIF.CAL-LASCAMM, CR-INSTM, Università della Calabria, Dipartimento di Chimica e Tecnologie Chimiche; 87026, Arcavacata di Rende (CS), ITALY.*

### Table of Contents

|                                                                                                   |           |
|---------------------------------------------------------------------------------------------------|-----------|
| <b>Table S1. UV-VIS spectroscopic data for the studied compounds.....</b>                         | <b>3</b>  |
| <b>Figure S1. UV spectra in CH<sub>2</sub>Cl<sub>2</sub> and toluene of porphyrazine 3a. ....</b> | <b>4</b>  |
| <b>Figure S2. UV spectra in CH<sub>2</sub>Cl<sub>2</sub> and toluene of porphyrazine 7. ....</b>  | <b>4</b>  |
| <b>Figure S3. UV spectra in CH<sub>2</sub>Cl<sub>2</sub> and toluene of porphyrazine 10. ....</b> | <b>5</b>  |
| <b>Figure S4. PXRD diffraction pattern of compound 9b. ....</b>                                   | <b>5</b>  |
| <b>Figure S5. MALDI-MS spectrum of compound 3a .....</b>                                          | <b>6</b>  |
| <b>Figure S6. MALDI_MS spectrum of compound 4a.....</b>                                           | <b>7</b>  |
| <b>Figure S7. MALDI-MS spectrum of compound 5 .....</b>                                           | <b>8</b>  |
| <b>Figure S8. MALDI-MS spectrum of compound 6 .....</b>                                           | <b>9</b>  |
| <b>Figure S9. MALDI-MS spectrum of compound 7 .....</b>                                           | <b>10</b> |
| <b>Figure S10. MALDI-MS spectrum of compound 8 .....</b>                                          | <b>11</b> |
| <b>Figure S11. MALDI-MS spectrum of compound 9a .....</b>                                         | <b>12</b> |
| <b>Figure S12. MALDI-MS spectrum of compound 9b .....</b>                                         | <b>13</b> |
| <b>Figure S13. MALDI-MS spectrum of compound 10 .....</b>                                         | <b>14</b> |
| <b>Figure S14. MALDI-MS spectrum of compound 11 .....</b>                                         | <b>15</b> |
| <b>Figure S15. MALDI-MS spectrum of compound 12 .....</b>                                         | <b>16</b> |
| <b>Figure S16. <sup>1</sup>H NMR spectrum of compound 3a.....</b>                                 | <b>17</b> |
| <b>Figure S17. <sup>1</sup>H NMR spectrum of compound 4a.....</b>                                 | <b>17</b> |
| <b>Figure S18. <sup>1</sup>H NMR spectrum of compound 5.....</b>                                  | <b>18</b> |
| <b>Figure S19. <sup>1</sup>H NMR spectrum of compound 6.....</b>                                  | <b>18</b> |

|                                                                                        |           |
|----------------------------------------------------------------------------------------|-----------|
| <b>Figure S20. <sup>1</sup>H NMR spectrum of compound 7.....</b>                       | <b>19</b> |
| <b>Figure S21. <sup>1</sup>H NMR spectrum of compound 8.....</b>                       | <b>19</b> |
| <b>Figure S22. <sup>1</sup>H NMR spectrum of compound 9a.....</b>                      | <b>20</b> |
| <b>Figure S23. <sup>1</sup>H NMR spectrum of compound 9b .....</b>                     | <b>20</b> |
| <b>Figure S24. <sup>1</sup>H NMR spectrum of compound 10.....</b>                      | <b>21</b> |
| <b>Figure S25. <sup>1</sup>H NMR spectrum of compound 11.....</b>                      | <b>21</b> |
| <b>Figure S26. <sup>1</sup>H NMR spectrum of compound 12.....</b>                      | <b>22</b> |
| <b>Figure S27. Computed dihedral angle between macrocycle and aryl moiety .....</b>    | <b>23</b> |
| <b>Table S2. Macrocycle charges (sum of atomic Mulliken charges).....</b>              | <b>23</b> |
| <b>Figure S28. Plot of macrocycle charges vs dihedral angle in porphyrazines .....</b> | <b>24</b> |
| <b>Table S3. Computed molecular structures.....</b>                                    | <b>25</b> |
| <b>Role of metal d orbital in the Suzuki-Miyaura reaction .....</b>                    | <b>36</b> |
| <b>Figure S28. <sup>1</sup>H NMR spectrum of compound 1a.....</b>                      | <b>37</b> |
| <b>Figure S29. <sup>1</sup>H NMR spectrum of compound Ni-1a .....</b>                  | <b>37</b> |

**Table S1. UV-VIS spectroscopic data for the studied compounds.**

| Compound | Solvent                         | Absorption, RT                                                                                                   |
|----------|---------------------------------|------------------------------------------------------------------------------------------------------------------|
|          |                                 | $\lambda_{max}/nm$ (log $\epsilon/M^{-1}cm^{-1}$ )<br>$cm^{-1}$ (log $\epsilon/M^{-1}cm^{-1}$ )                  |
| 1a a     | CH <sub>2</sub> Cl <sub>2</sub> | 354 (4.66) Soret; 498 (4.31); 637 (4.45); 714 (4.59) Q bands                                                     |
|          |                                 | 28250 (4.66) Soret; 20080 (4.31); 15700 (4.45); 14006 (4.59) Q bands                                             |
| 2a a     | CH <sub>2</sub> Cl <sub>2</sub> | 354 (4.42) Soret; 472 (3.97); 608 <sup>b</sup> (4.09); 636 (4.21); 704 (4.34) Q bands                            |
|          |                                 | 28250 (4.42) Soret; 21190 (3.97); 16450 <sup>b</sup> (4.09); 15720 (4.21); 14230 (4.34) Q bands                  |
| 3a       | CH <sub>2</sub> Cl <sub>2</sub> | 359 (4.69) Soret; 511 (4.32); 637 (4.46); 704 (4.57) Q bands                                                     |
|          |                                 | 27860 (4.69) Soret; 19570 (4.32); 15700 (4.46); 14210 (4.57) Q bands                                             |
| 3a       | Toluene                         | 359 (4.59) Soret; 502 <sup>b,c</sup> (4.29); 544 <sup>b,c</sup> (4.31); 645 (4.43); 708 (4.55) Q bands           |
|          |                                 | 27860 (4.59) Soret; 19920 <sup>b,c</sup> (4.29); 18382 <sup>b,c</sup> (4.31); 15500 (4.43); 14124 (4.55) Q bands |
| 4a       | CH <sub>2</sub> Cl <sub>2</sub> | 327 (4.49) Soret; 477 (4.07); 655 (4.46) Q bands                                                                 |
|          |                                 | 30581 (4.49) Soret; 20960 (4.07); 15270 (4.46) Q bands                                                           |
| 4a       | Toluene                         | 330 (4.36) Soret; 486 (4.01); 660 (4.38) Q bands                                                                 |
|          |                                 | 30300 (4.36) Soret; 20580 (4.01); 15150 (4.38) Q bands                                                           |
| 5        | CH <sub>2</sub> Cl <sub>2</sub> | 358 (4.64) Soret; 497 (4.23); 639 (4.39); 705 (4.54) Q bands                                                     |
|          |                                 | 27930 (4.64) Soret; 20120 (4.23); 15650 (4.39); 14280 (4.54) Q bands                                             |
| 5        | Toluene                         | 355 (4.56) Soret; 498 (4.21); 641 (4.38); 711 (4.52) Q bands                                                     |
|          |                                 | 28170 (4.56) Soret; 20080 (4.21); 15600 (4.38); 14070 (4.52) Q bands                                             |
| 6        | CH <sub>2</sub> Cl <sub>2</sub> | 359 (4.63) Soret; 494 (4.26); 637 (4.42); 704 (4.55) Q bands                                                     |
|          |                                 | 27860 (4.63) Soret; 20240 (4.26); 15700 (4.42); 14210 (4.55) Q bands                                             |
| 6        | Toluene                         | 360 (4.63) Soret; 498 (4.23); 640 (4.39); 710 (4.54) Q bands                                                     |
|          |                                 | 27780 (4.63) Soret; 20080 (4.23); 15630 (4.39); 14090 (4.54) Q bands                                             |
| 7        | CH <sub>2</sub> Cl <sub>2</sub> | 350 (4.68) Soret; 511 <sup>b,c</sup> (4.17); 555 <sup>b,c</sup> (4.24); 630 (4.45); 713 (4.52) Q bands           |
|          |                                 | 28570 (4.68) Soret; 19570 <sup>b,c</sup> (4.17); 18018 <sup>b,c</sup> (4.24); 15870 (4.45); 14030 (4.52) Q bands |
| 7        | Toluene                         | 356 (4.61) Soret; 512 <sup>b,c</sup> (4.25); 555 <sup>b,c</sup> (4.32); 631 (4.44); 717 (4.52) Q bands           |
|          |                                 | 28090 (4.61) Soret; 19530 <sup>b,c</sup> (4.25); 18020 <sup>b,c</sup> (4.32); 15850 (4.44); 13950 (4.52) Q bands |
| 8        | CH <sub>2</sub> Cl <sub>2</sub> | 323 (4.45) Soret; 509 (3.99); 620 <sup>b,c</sup> (4.26); 665 (4.40) Q bands                                      |
|          |                                 | 30960 (4.45) Soret; 19650 (3.99); 16130 <sup>b,c</sup> (4.26); 15040 (4.40) Q bands                              |
| 8        | Toluene                         | 325 (4.32) Soret; 511 (3.99); 616 <sup>b,c</sup> (4.20); 667 (4.36) Q bands                                      |
|          |                                 | 30770 (4.32) Soret; 19570 (3.99); 16230 <sup>b,c</sup> (4.20); 14990 (4.36) Q bands                              |
| 9a       | CH <sub>2</sub> Cl <sub>2</sub> | 341 (4.48) Soret; 489 (4.04); 669 (4.32) Q bands                                                                 |
|          |                                 | 29330 (4.48) Soret; 20450 (4.04); 14950 (4.32) Q bands                                                           |
| 9a       | Toluene                         | 348 (4.20) Soret; 492 (3.95); 671 (4.25) Q bands                                                                 |
|          |                                 | 28740 (4.20) Soret; 20330 (3.95); 14900 (4.25) Q bands                                                           |
| 9b       | CH <sub>2</sub> Cl <sub>2</sub> | 325 (4.74) Soret; 499 (4.41); 674 (4.73) Q bands                                                                 |
|          |                                 | 30770 (4.74) Soret; 20040 (4.41); 14840 (4.73) Q bands                                                           |
| 9b       | Toluene                         | 328 (4.66) Soret; 498 (4.36); 674 (4.68) Q bands                                                                 |
|          |                                 | 30490 (4.66) Soret; 20080 (4.36); 14840 (4.68) Q bands                                                           |
| 10       | CH <sub>2</sub> Cl <sub>2</sub> | 344 (4.42) Soret; 381 <sup>b,c</sup> (4.10); 486 (4.03); 668 (4.30) Q bands                                      |
|          |                                 | 29070 (4.42) Soret; 26250 <sup>b,c</sup> (4.10); 20580 (4.03); 13970 (4.30) Q bands                              |
| 10       | Toluene                         | 350 (4.32) Soret; 489 (4.00); 671 (4.32) Q bands                                                                 |
|          |                                 | 28570 (4.32) Soret; 20450 (4.00); 14900 (4.32) Q bands                                                           |
| 11       | CH <sub>2</sub> Cl <sub>2</sub> | 329 (4.86) Soret; 511 (4.40); 621 <sup>b,c</sup> (4.63); 665 (4.75) Q bands                                      |
|          |                                 | 30400 (4.86) Soret; 19570 (4.40); 16100 <sup>b,c</sup> (4.63); 15040 (4.75) Q bands                              |
| 11       | Toluene                         | 322 (4.73) Soret; 510 (4.34); 623 <sup>b,c</sup> (4.58); 668 (4.69) Q bands                                      |
|          |                                 | 31060 (4.73) Soret; 19610 (4.34); 16050 <sup>b,c</sup> (4.58); 14970 (4.69) Q bands                              |
| 12       | CH <sub>2</sub> Cl <sub>2</sub> | 325 (4.40) Soret; 484 (4.00); 660 (4.37) Q bands                                                                 |
|          |                                 | 30770 (4.40) Soret; 20660 (4.00); 15150 (4.37) Q bands                                                           |
| 12       | Toluene                         | 320 (4.33) Soret; 487 (4.00); 661 (4.36) Q bands                                                                 |
|          |                                 | 31250 (4.33) Soret; 20530 (4.00); 15130 (4.36) Q bands                                                           |

<sup>a</sup> Previously published data [ref.11]; <sup>b</sup> shoulder; <sup>c</sup> wavelength taken through spectral deconvolution.

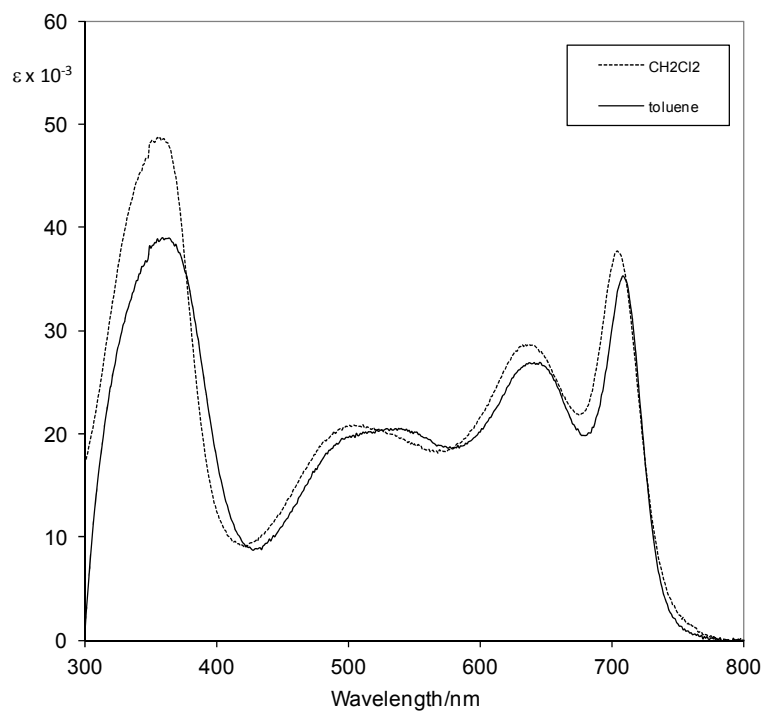

**Figure S1.** UV spectra in CH<sub>2</sub>Cl<sub>2</sub> and toluene of porphyrazine **3a**.

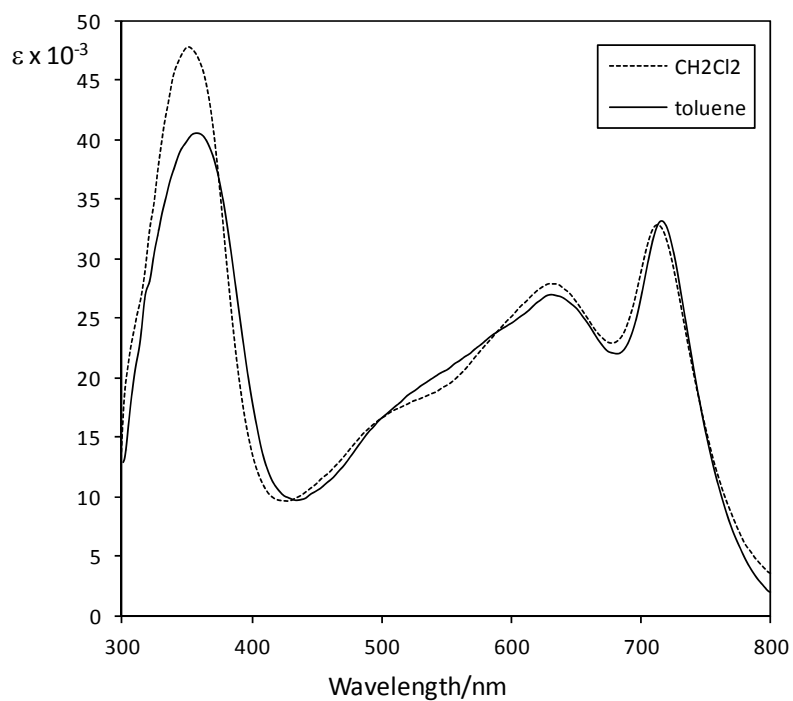

**Figure S2.** UV spectra in CH<sub>2</sub>Cl<sub>2</sub> and toluene of porphyrazine **7**.

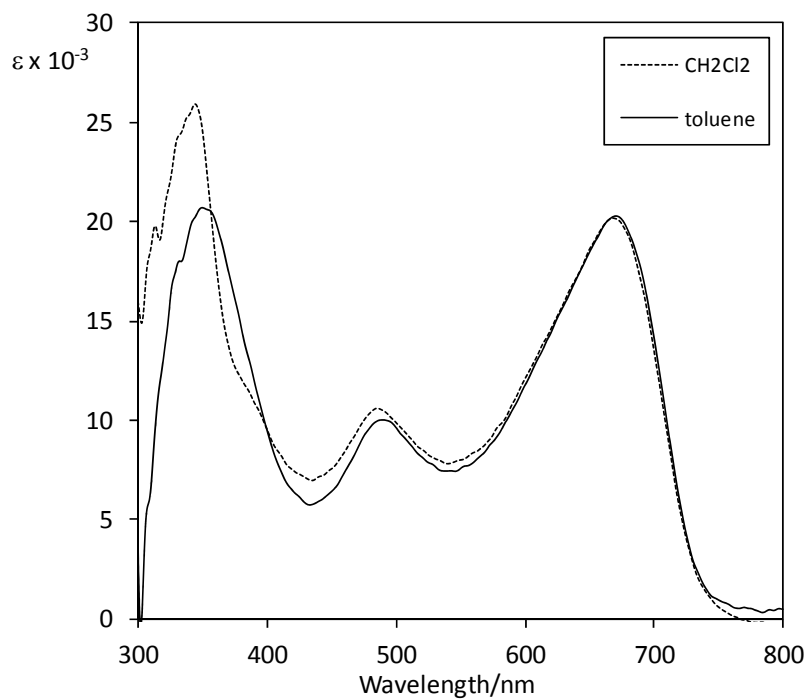

**Figure S3.** UV spectra in CH<sub>2</sub>Cl<sub>2</sub> and toluene of porphyrazine **10**.

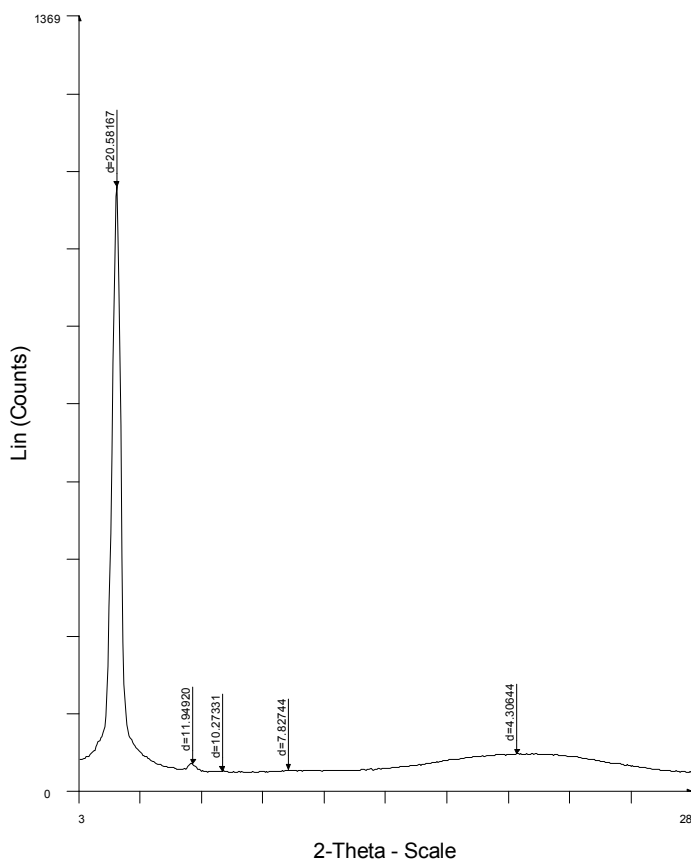

**Figure S4.** PXRD diffraction pattern of compound **9b** recorded at 110 °C on cooling.

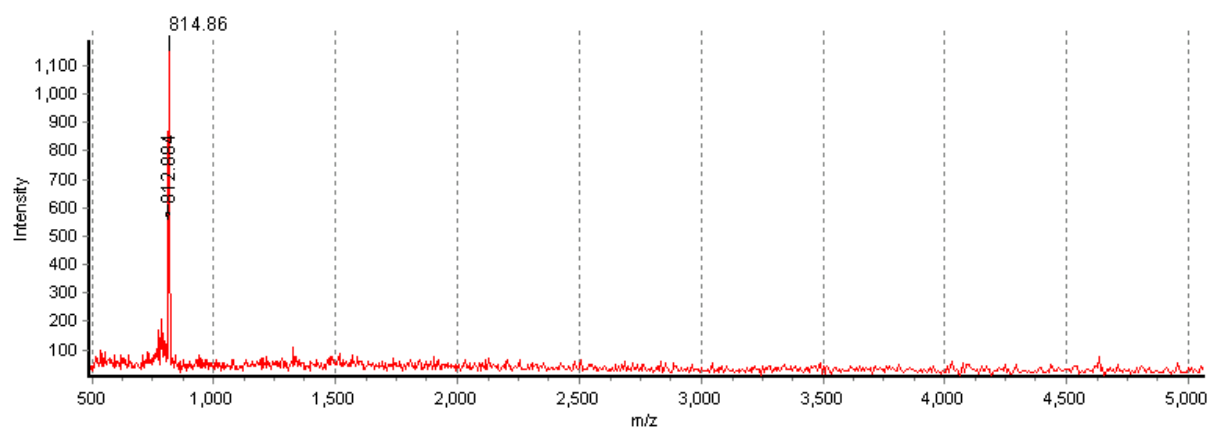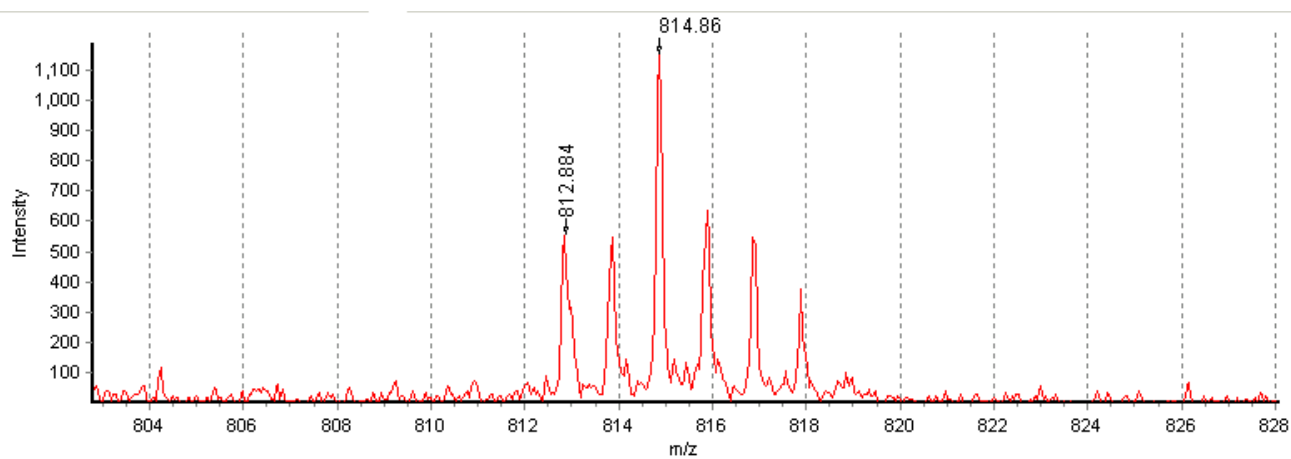

**Figure S5.** MALDI-MS spectrum of compound **3a**.

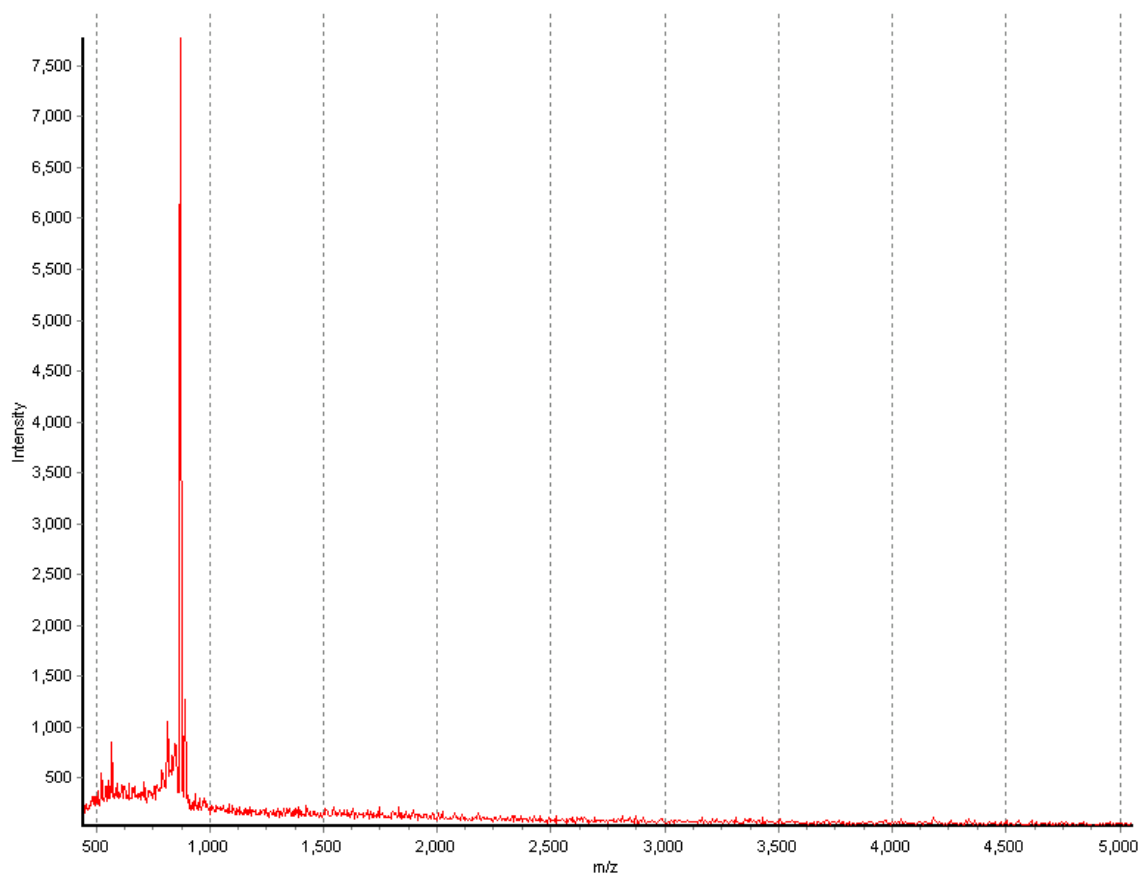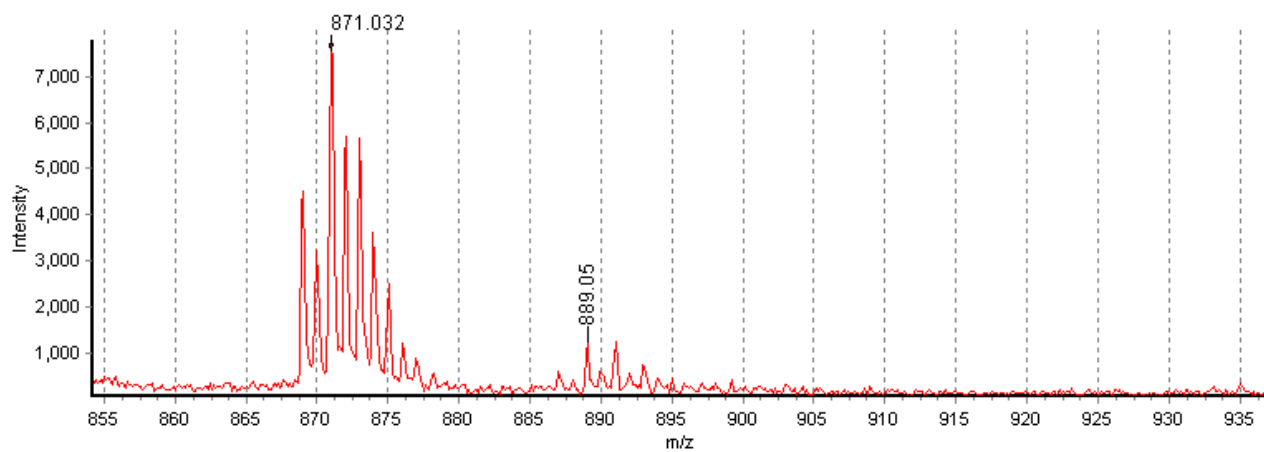

**Figure S6.** MALDI\_MS spectrum of compound **4a**.

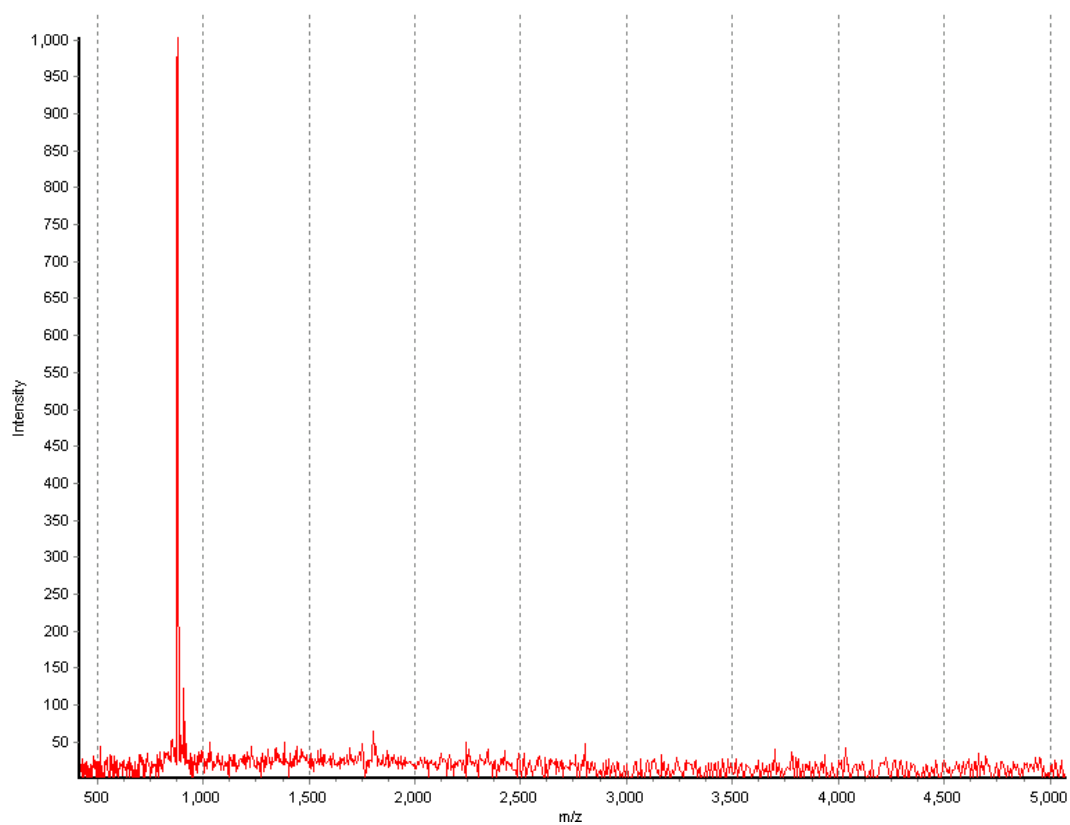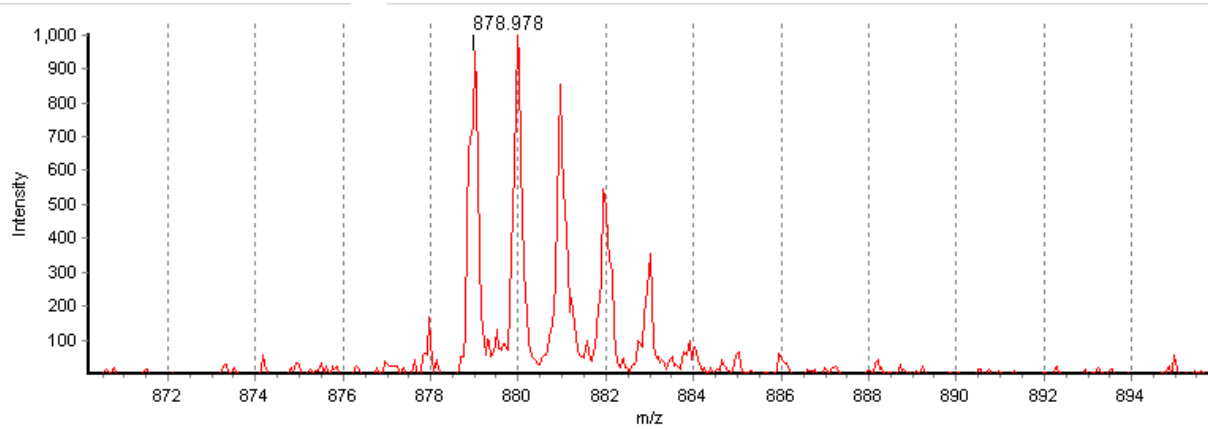

**Figure S7.** MALDI-MS spectrum of compound **5**.



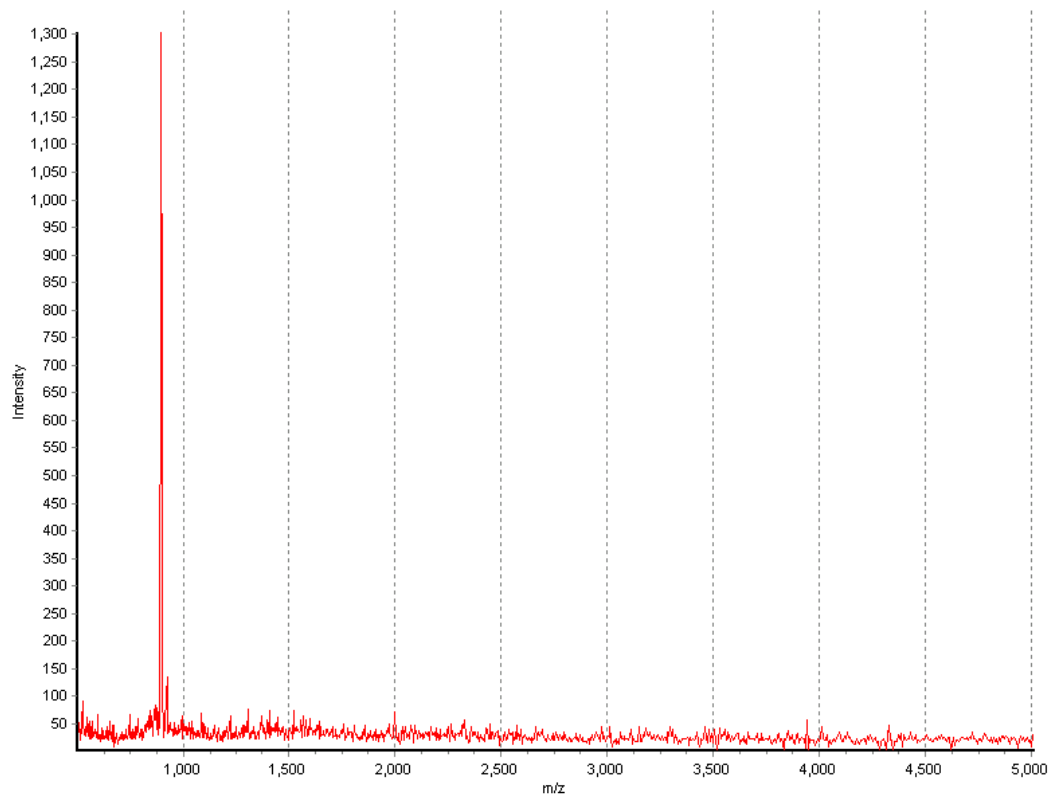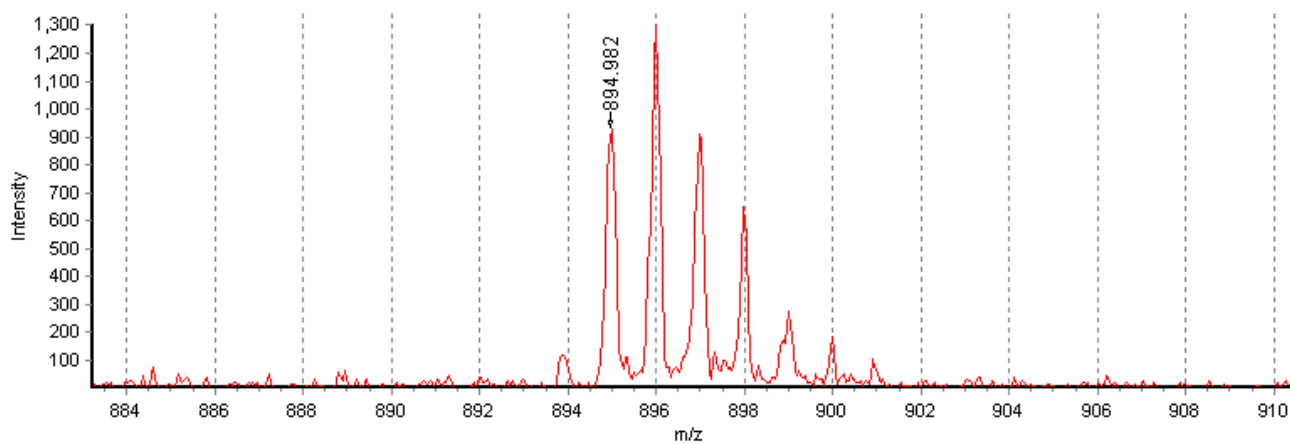

**Figure S8.** MALDI-MS spectrum of compound 6.

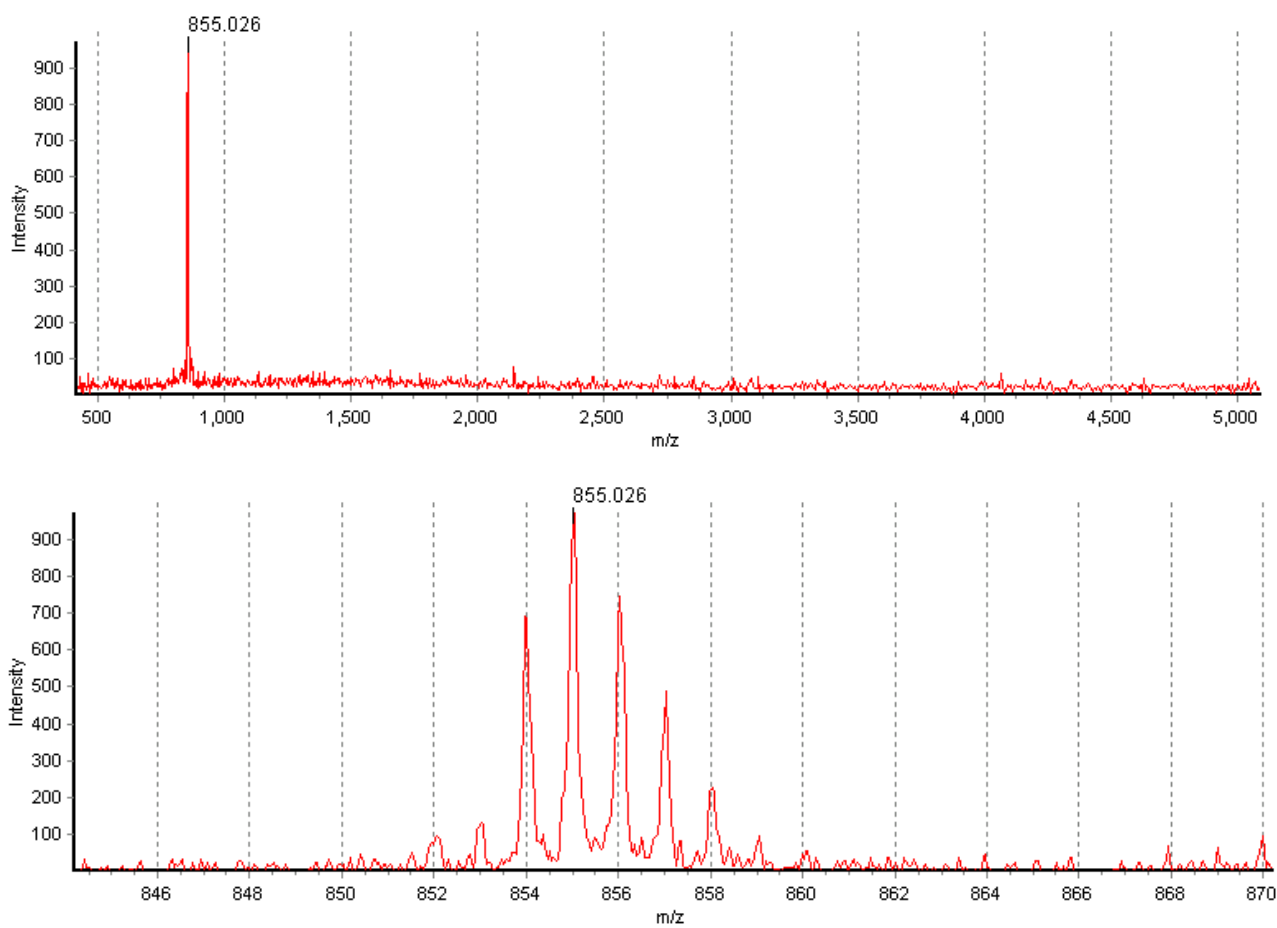

**Figure S9.** MALDI-MS spectrum of compound 7.

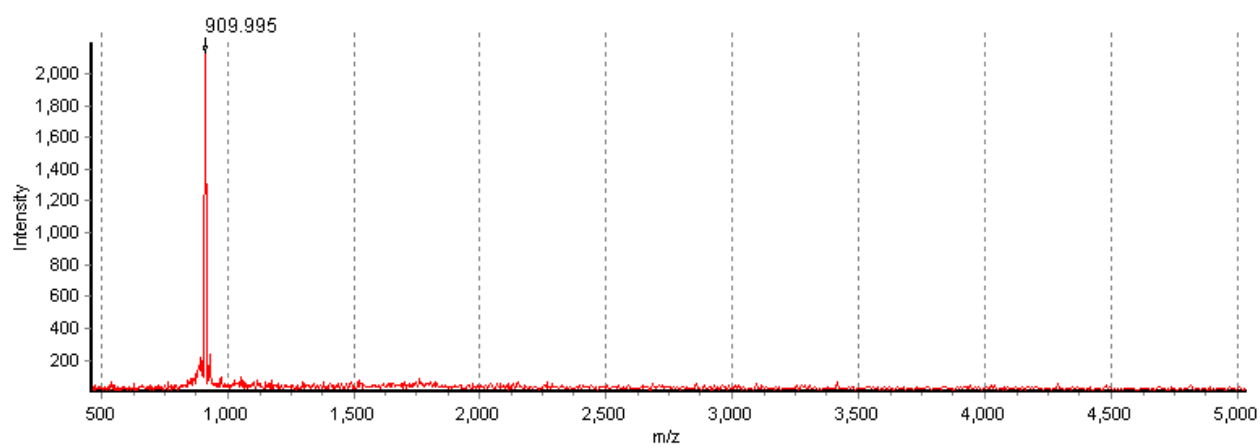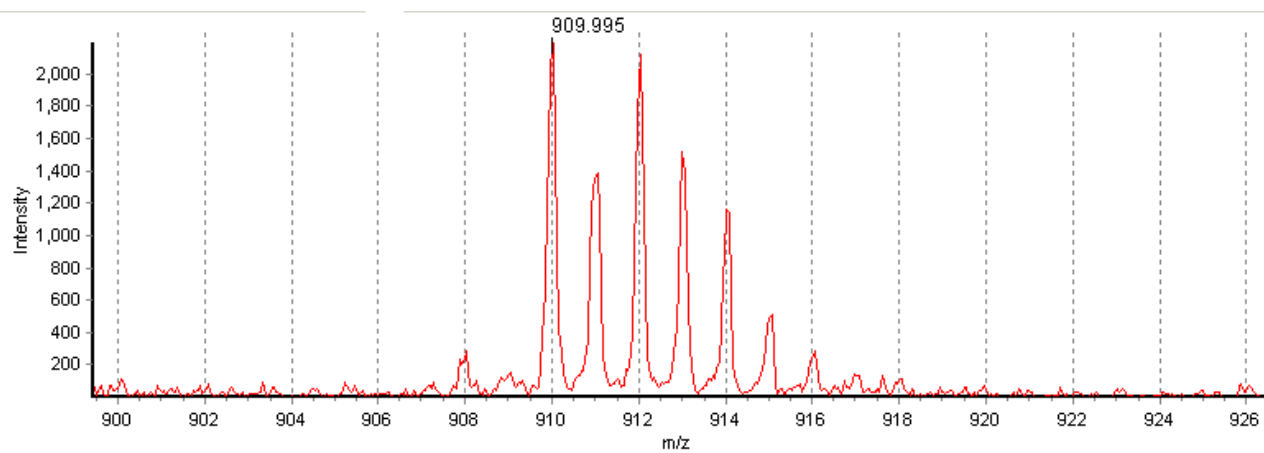

**Figure S10.** MALDI-MS spectrum of compound **8**.

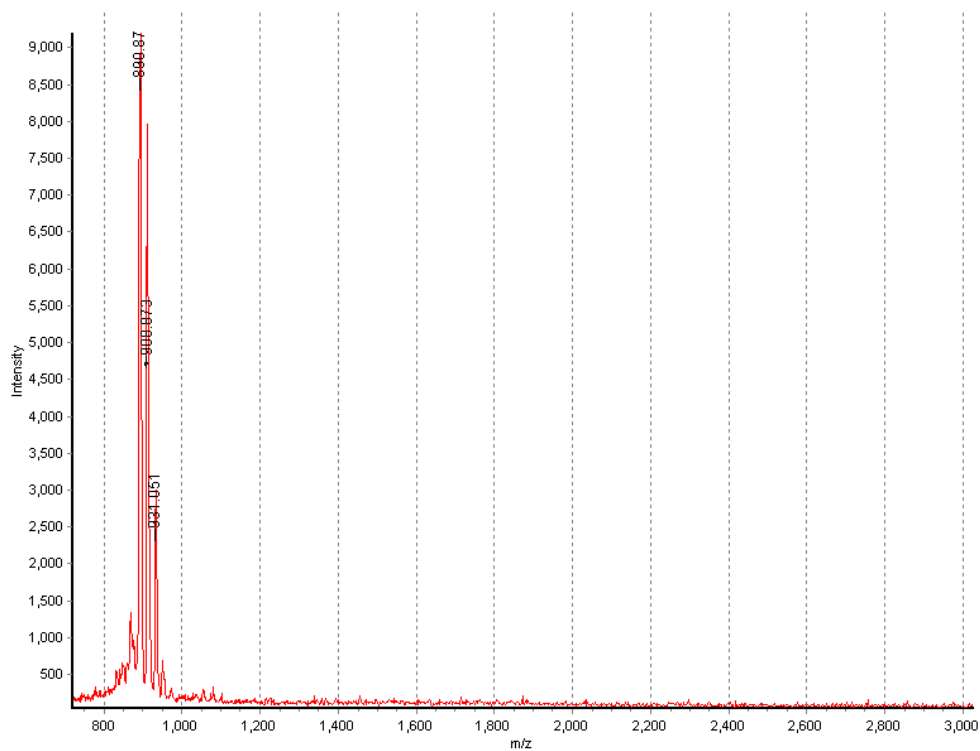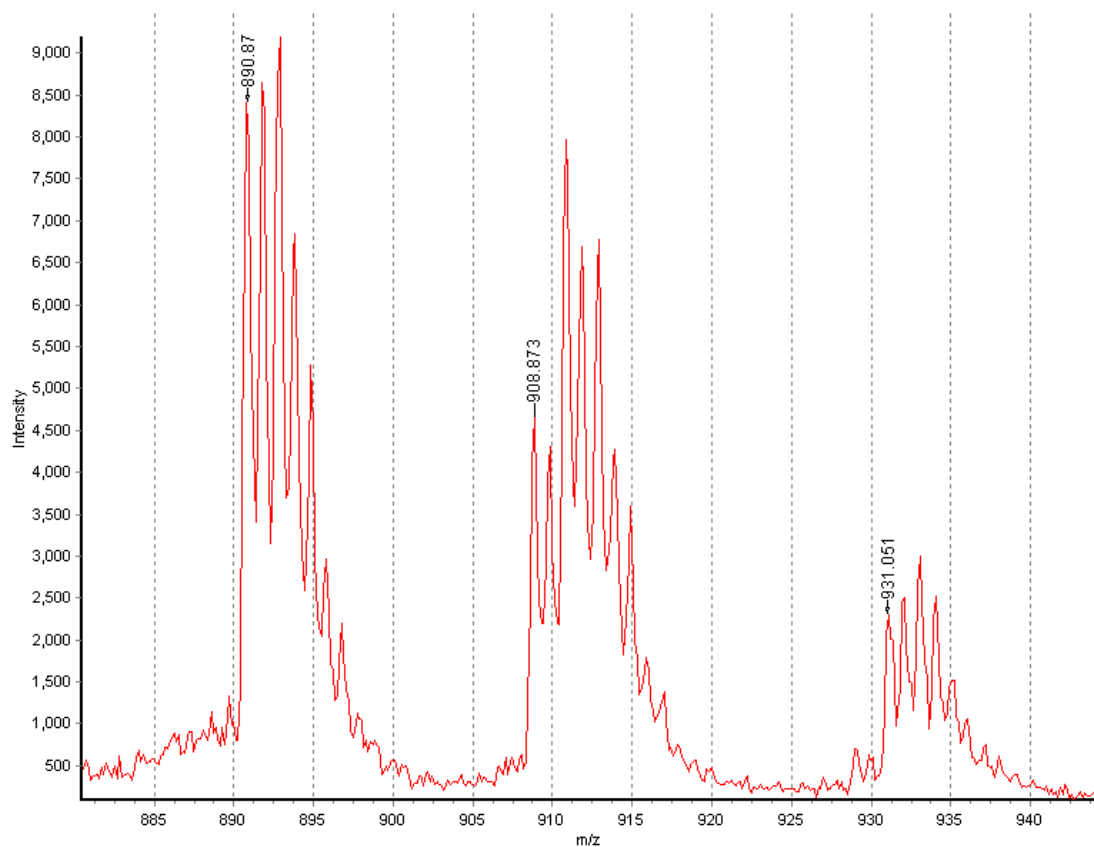

Figure S11. MALDI-MS spectrum of compound 9a.

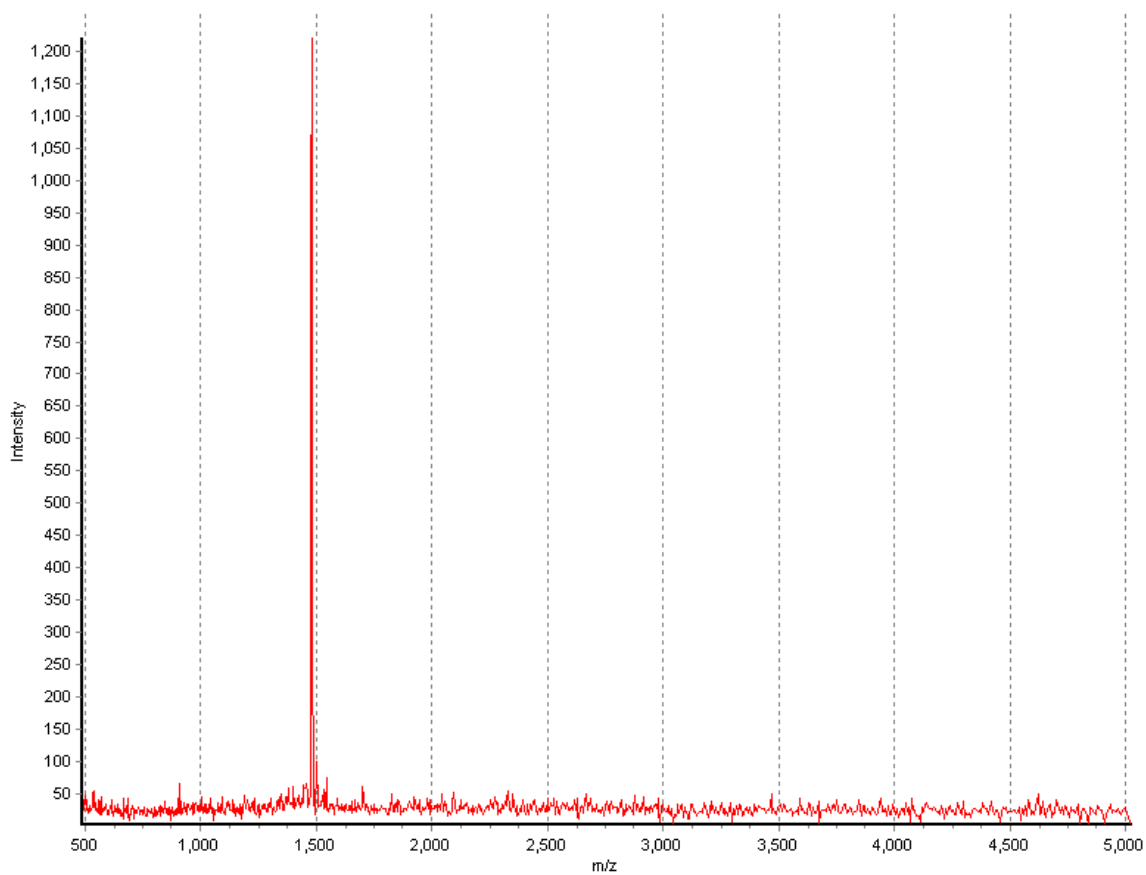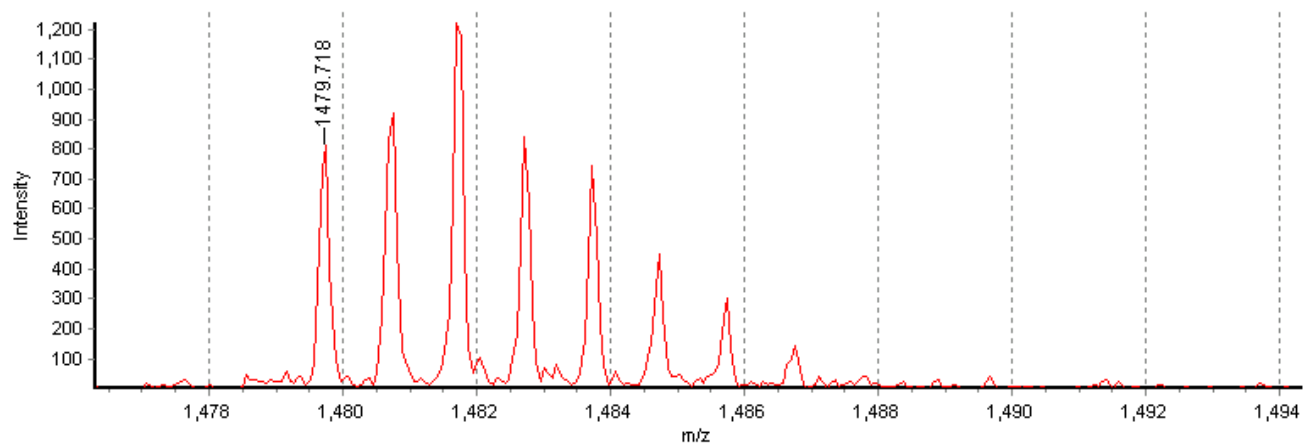

**Figure S12.** MALDI-MS spectrum of compound **9b**.

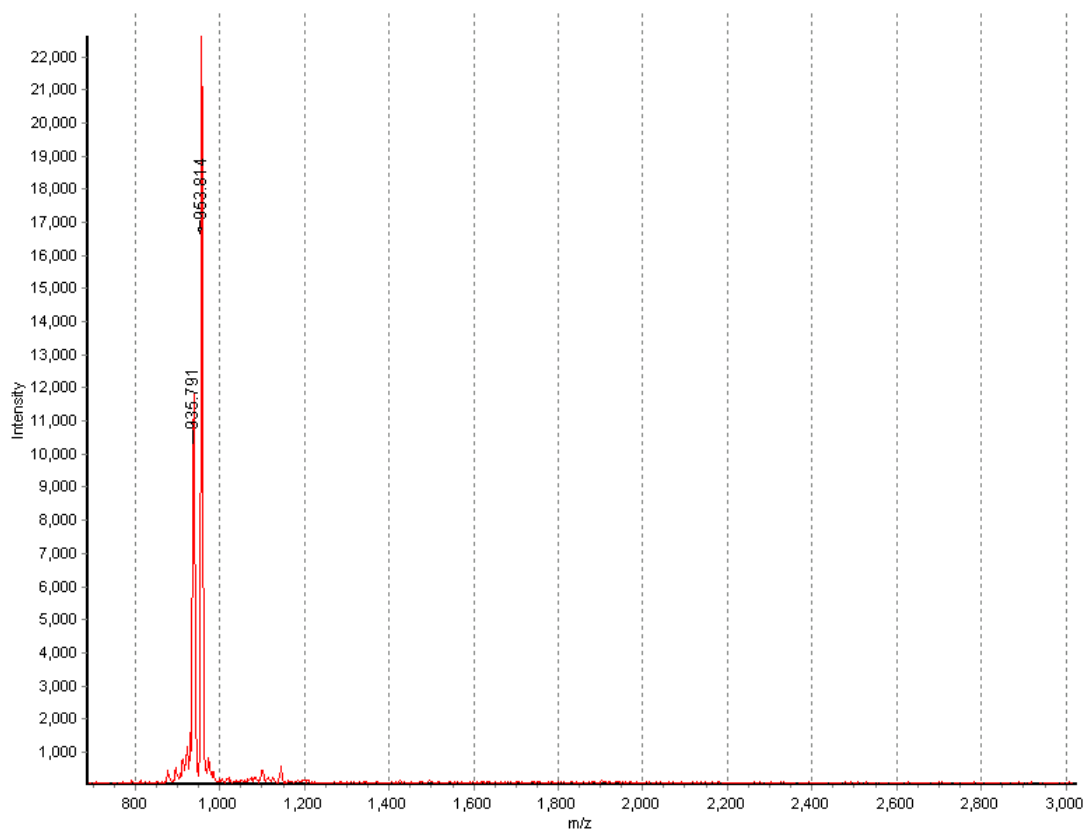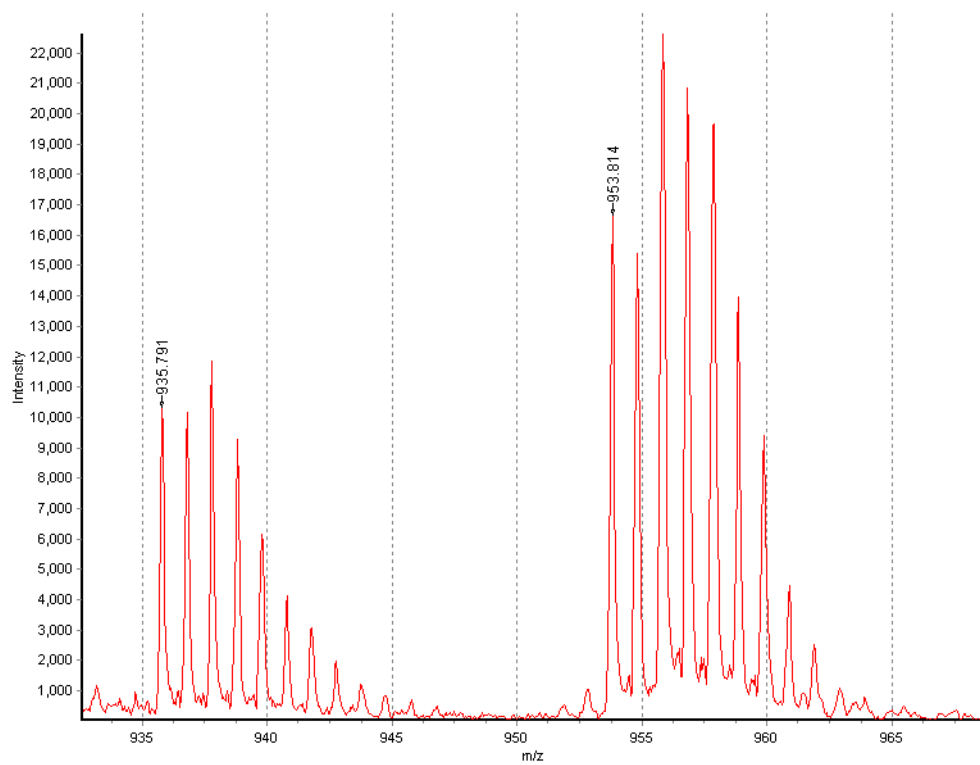

**Figure S13.** MALDI-MS spectrum of compound **10**

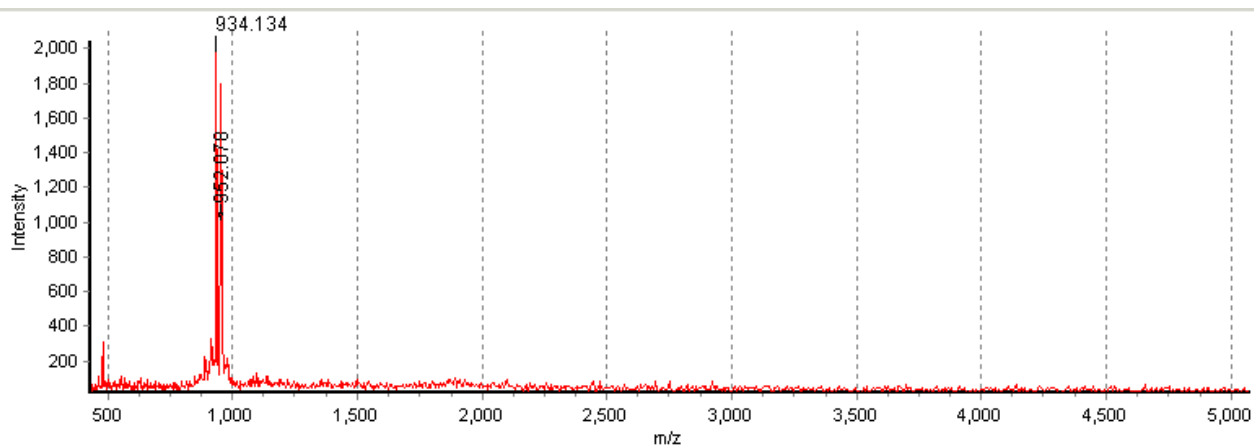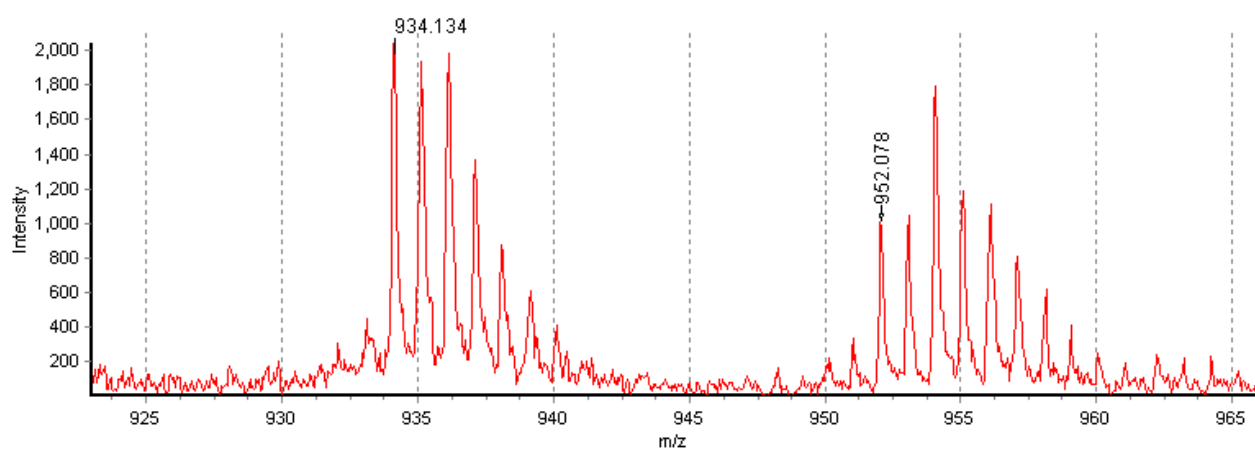

**Figure S14.** MALDI-MS spectrum of compound **11**

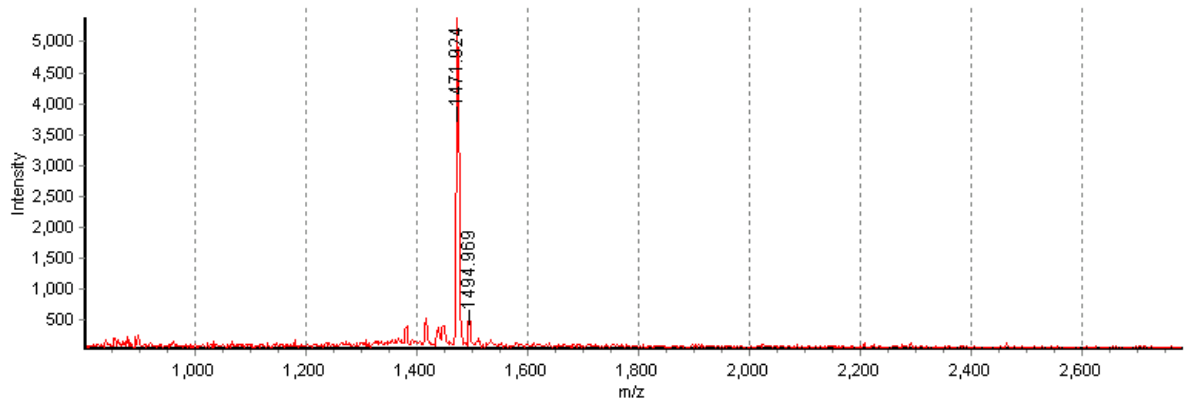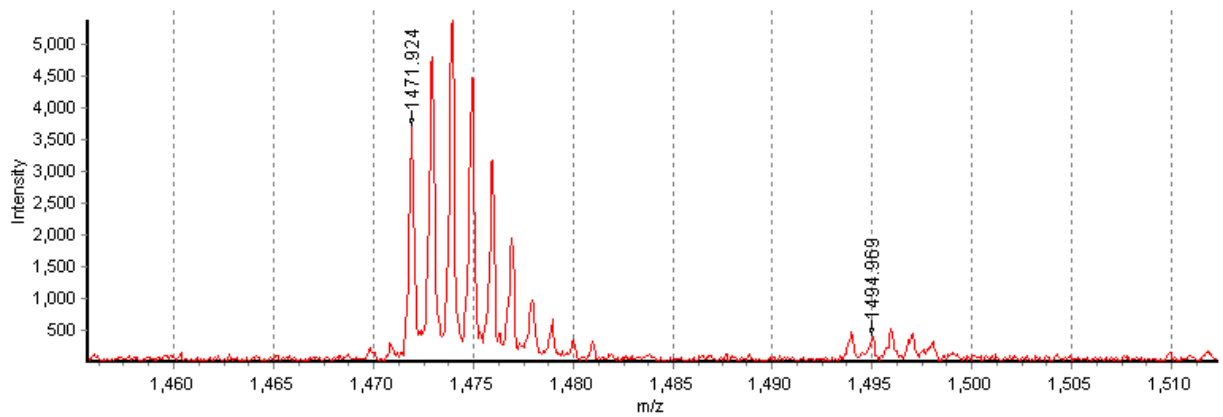

**Figure S15.** MALDI-MS spectrum of compound **12**



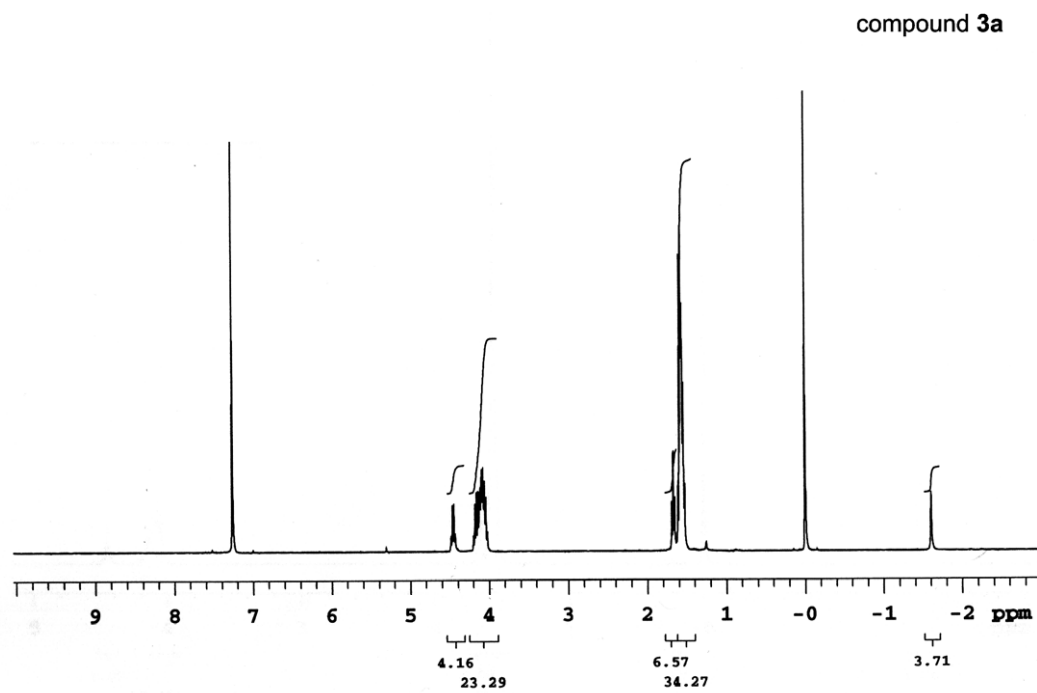

Figure S16.  $^1\text{H}$  NMR spectrum of compound 3a.

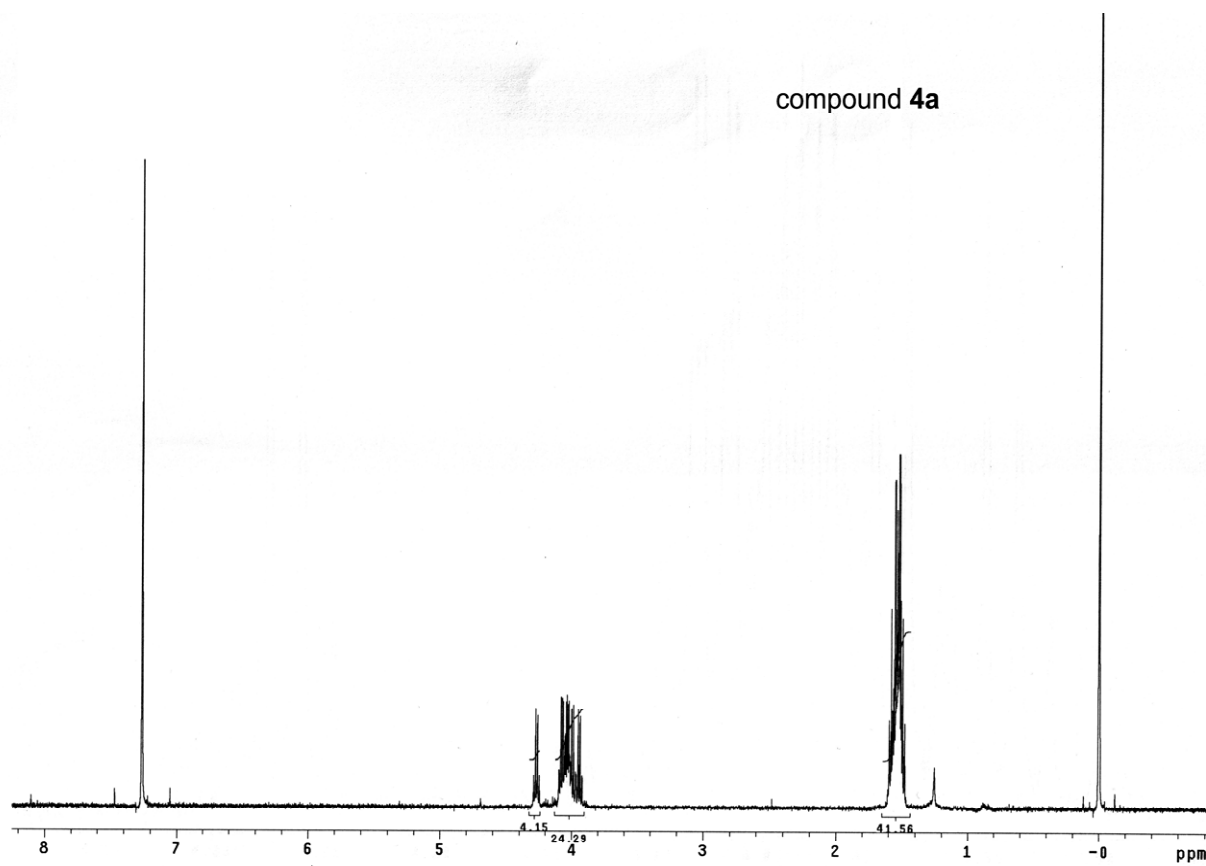

Figure S17.  $^1\text{H}$  NMR spectrum of compound 4a.

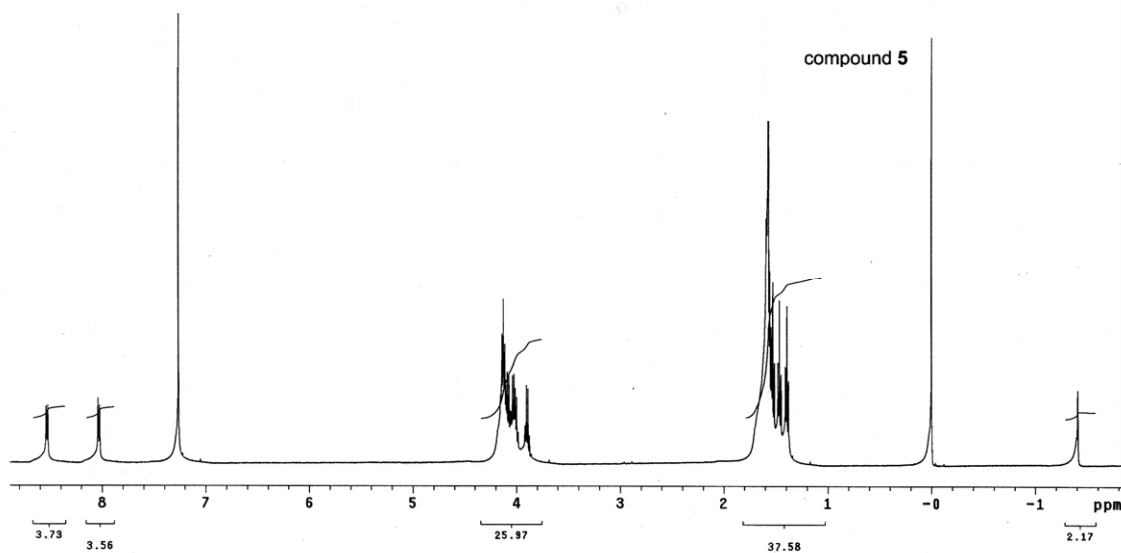

**Figure S18.**  $^1\text{H}$  NMR spectrum of compound 5.

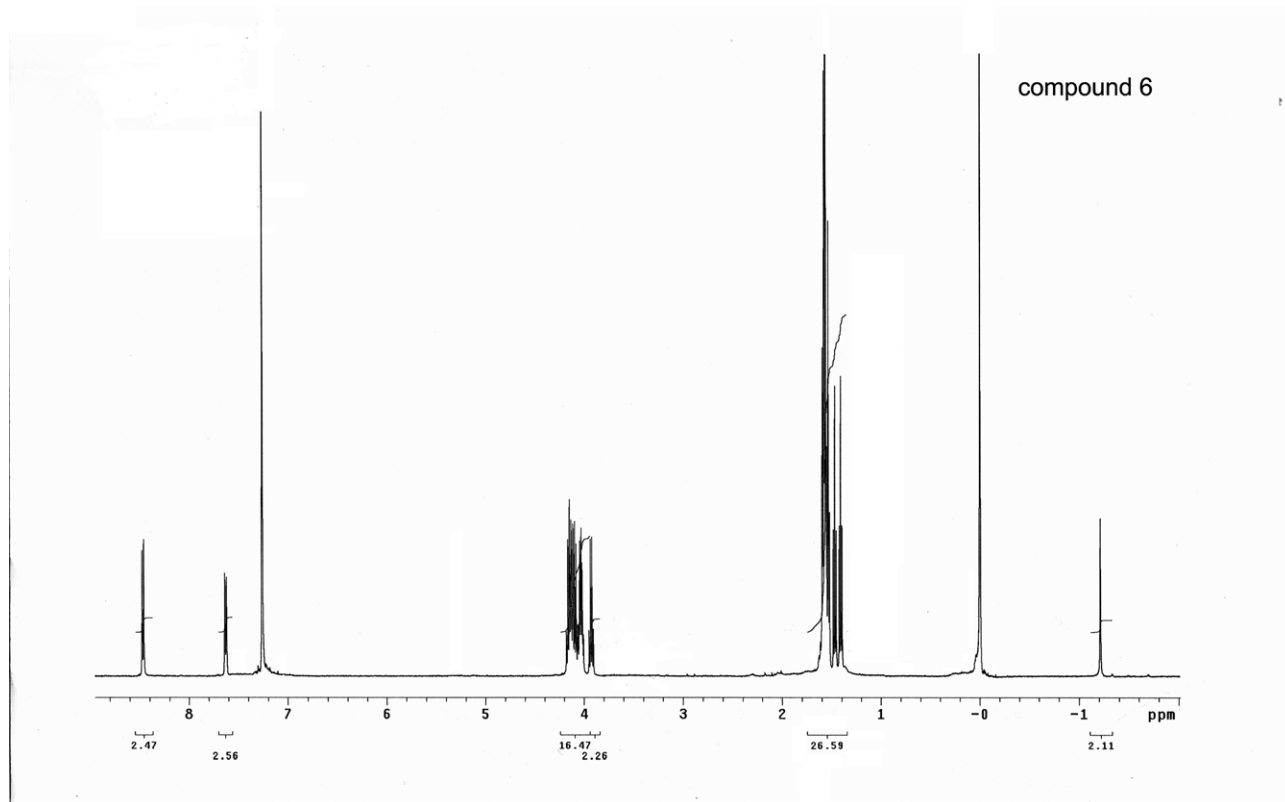

**Figure S19.**  $^1\text{H}$  NMR spectrum of compound 6.

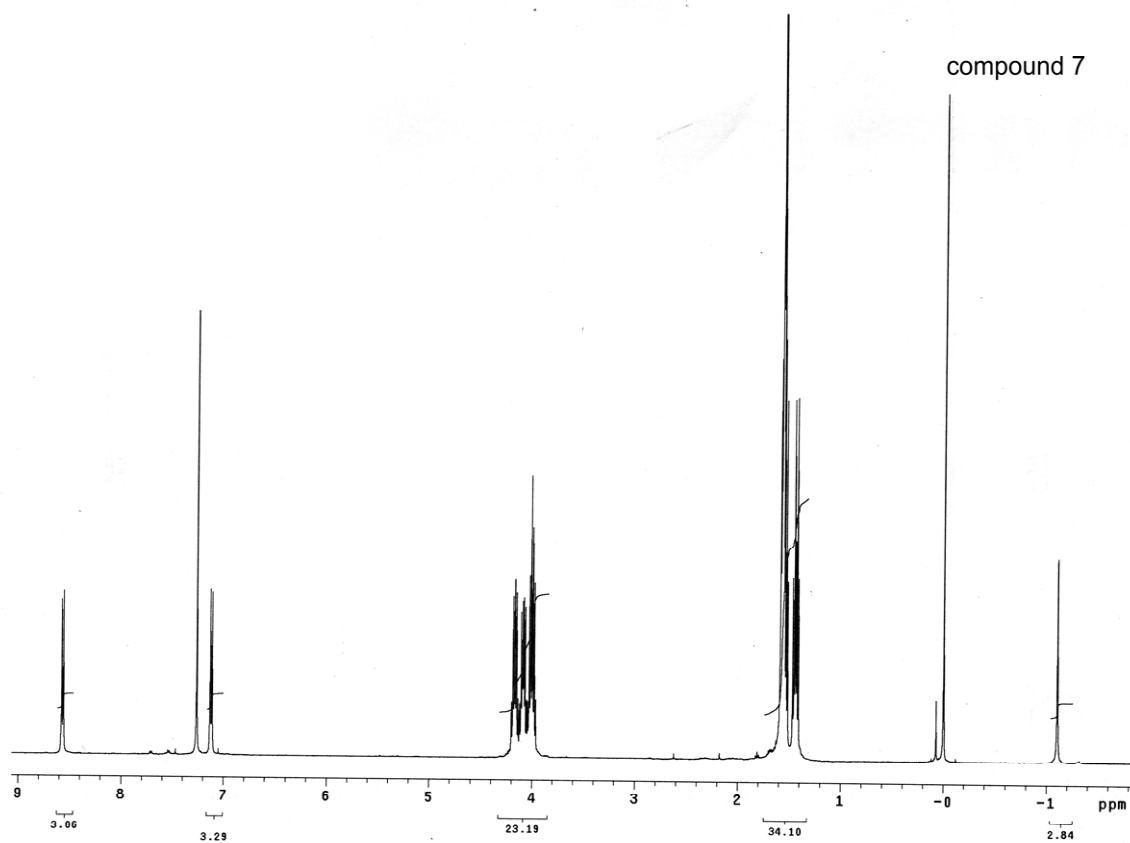

**Figure S20.** <sup>1</sup>H NMR spectrum of compound 7.

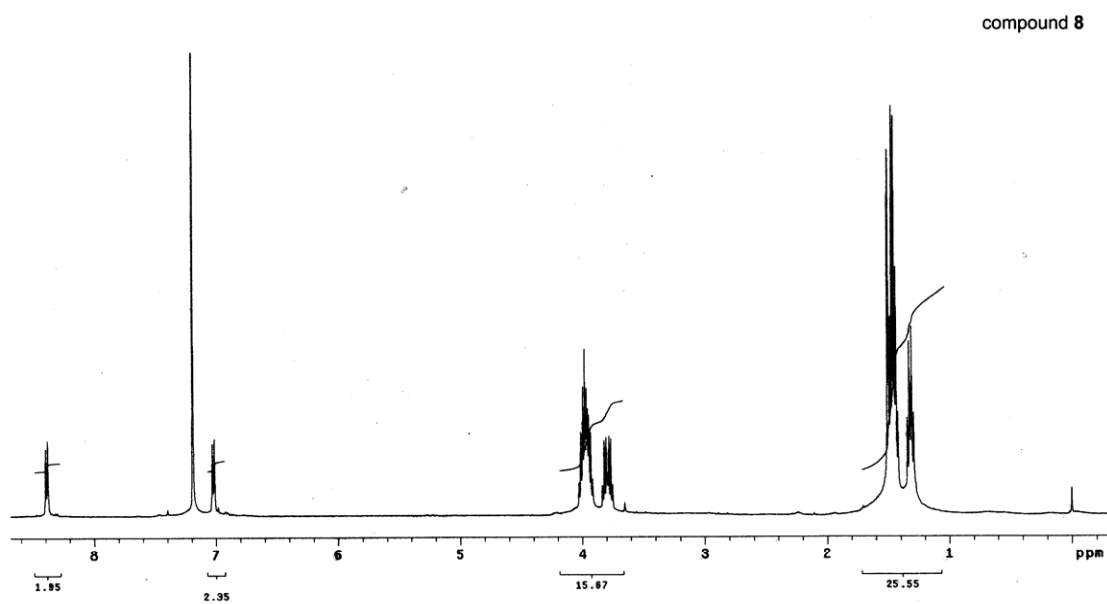

**Figure S21.** <sup>1</sup>H NMR spectrum of compound 8.

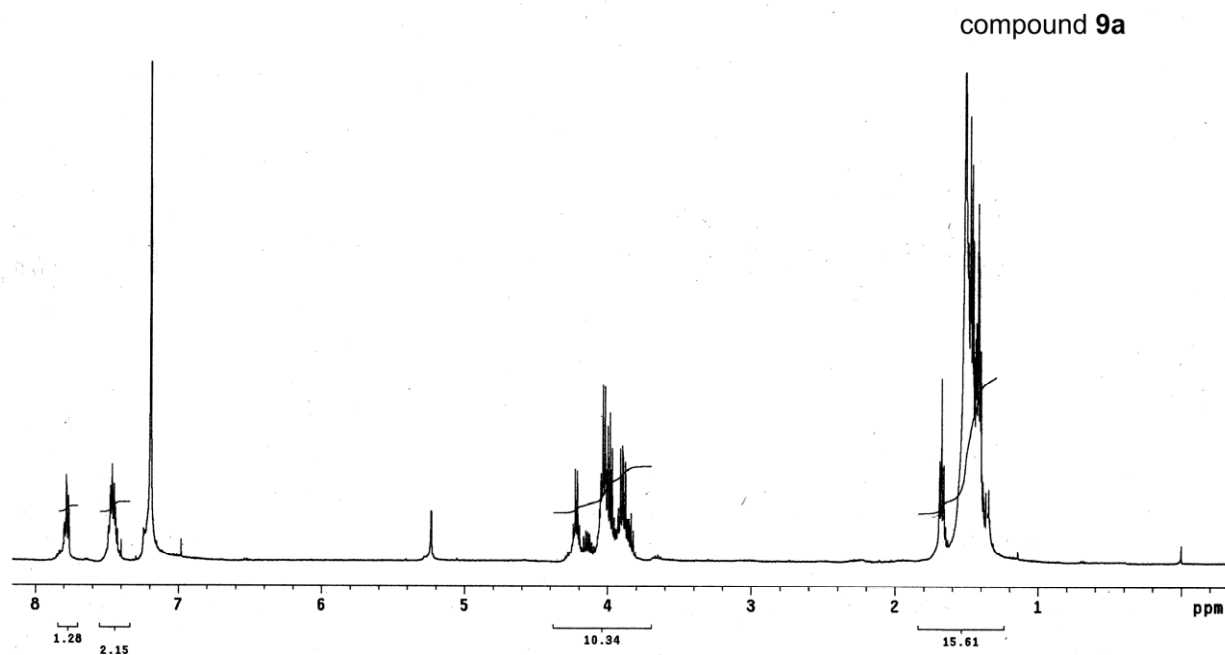

**Figure S22.**  $^1\text{H}$  NMR spectrum of compound **9a**.

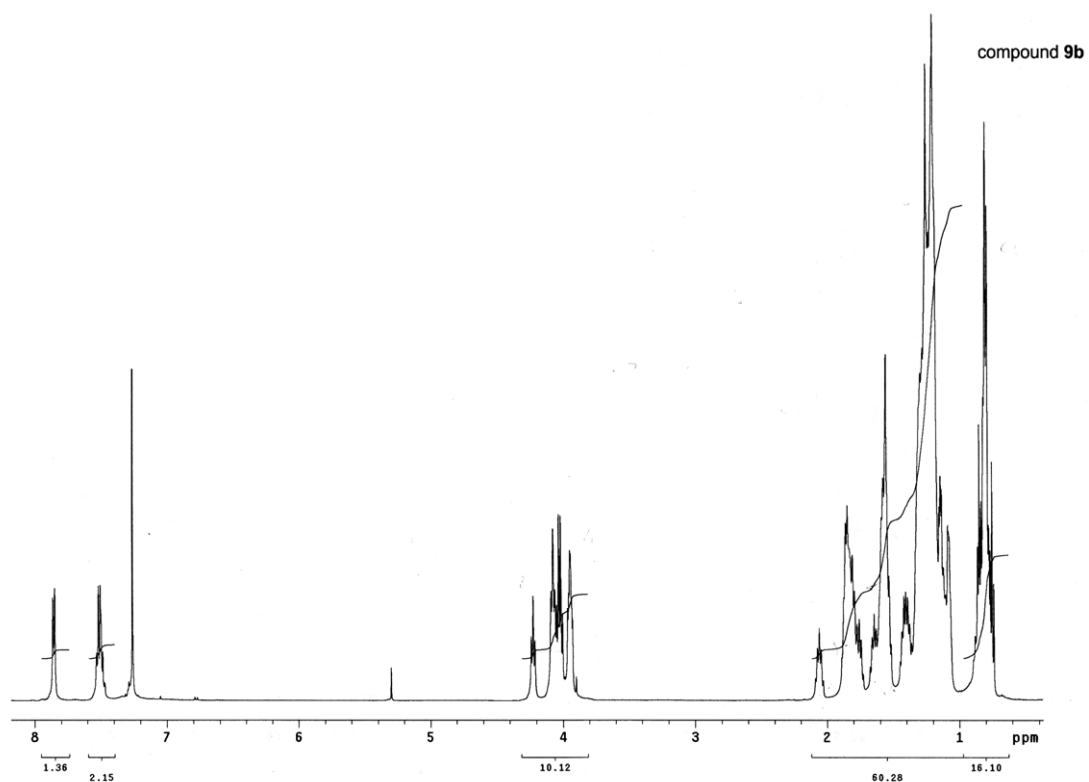

**Figure S23.**  $^1\text{H}$  NMR spectrum of compound **9b**.

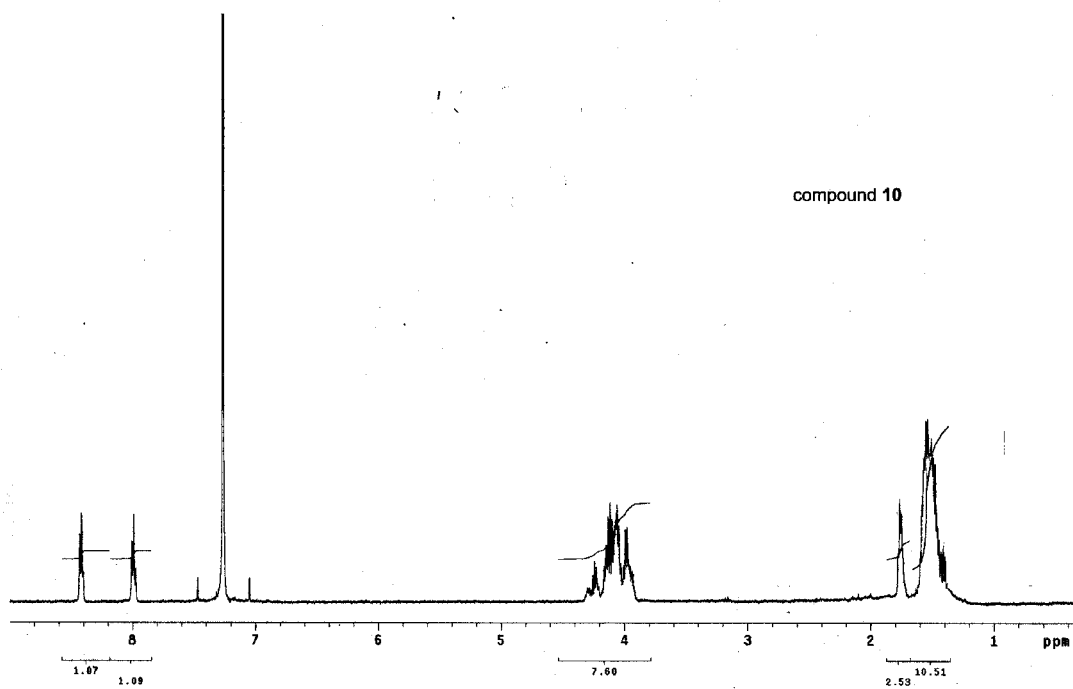

Figure S24. <sup>1</sup>H NMR spectrum of compound 10.

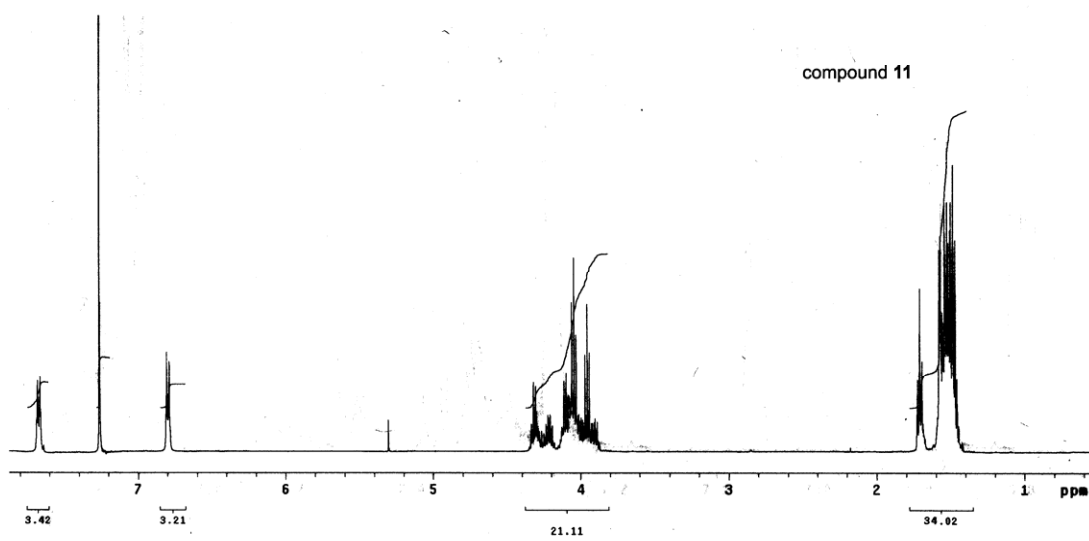

Figure S25. <sup>1</sup>H NMR spectrum of compound 11.

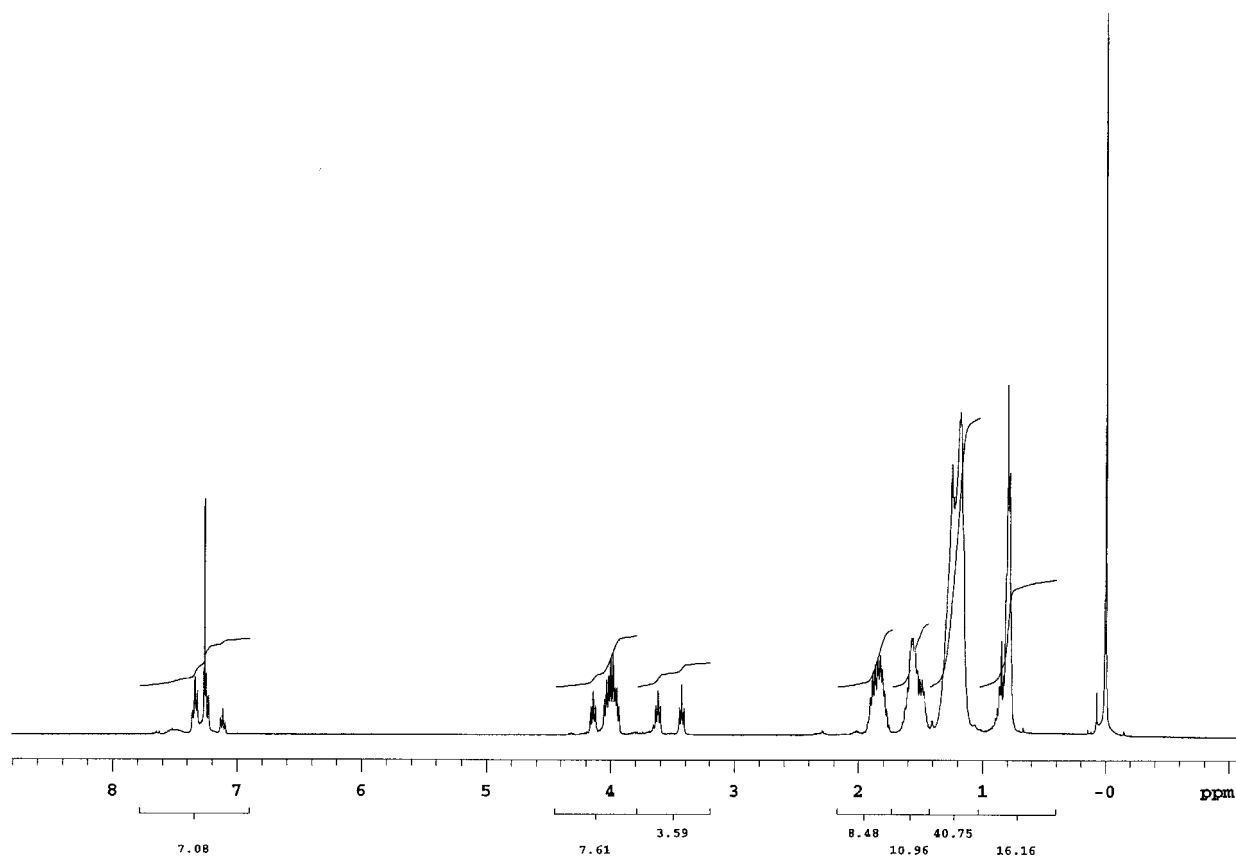

**Figure S26.** <sup>1</sup>H NMR spectrum of compound **12**.

## Computational Results: Structures and Mulliken Atomic Charges

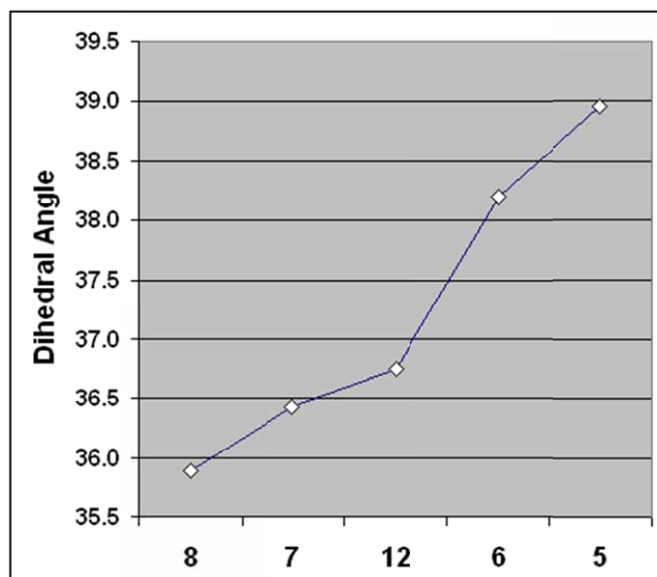

**Figure S27.** Computed dihedral angle between the average planes of the phenyl group and porphyrazine macrocycle. The thioalkyl chains were not included in the computation of the macrocycle average plane. The reported angles are degrees. Structure optimization at the B3LYP/6-31G\* level of approximation (in vacuum computations).

**Table S2.** Macrocycle charges (sum of atomic Mulliken charges) in all the studied complexes. B3LYP/6-31G\* (in vacuum computations).

| Compound | Charge |
|----------|--------|
| 11       | -0.174 |
| 8        | -0.156 |
| 7        | -0.146 |
| 12       | -0.116 |
| 9        | -0.114 |
| 6        | -0.070 |
| 5        | -0.065 |
| 10       | -0.059 |
| 3        | 0.058  |
| 4        | 0.064  |

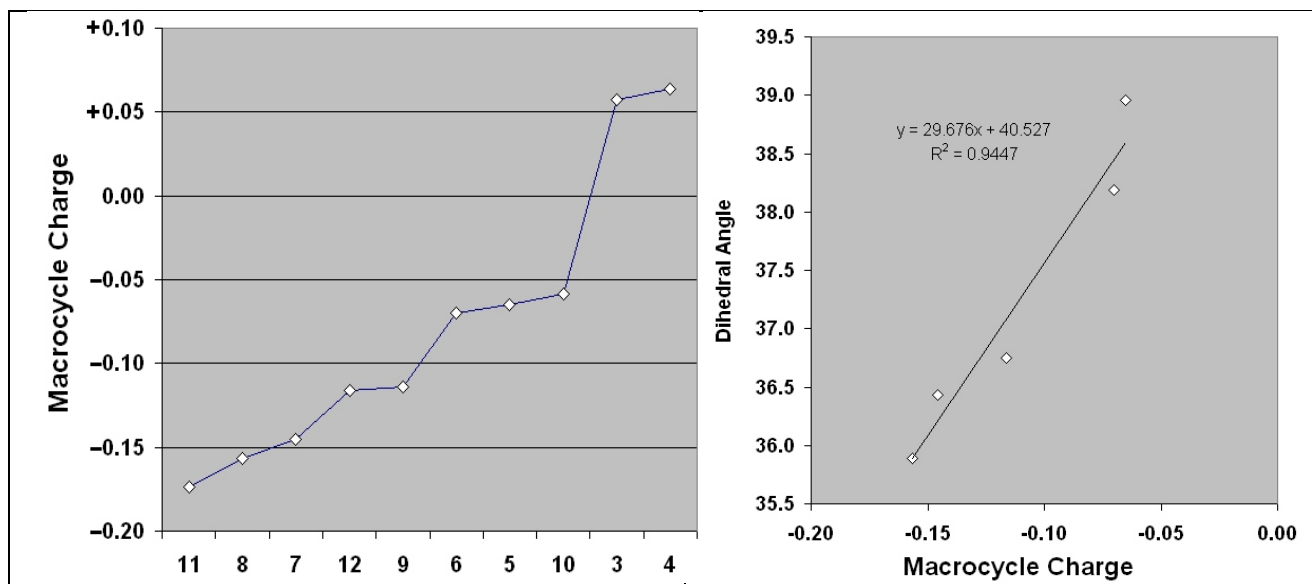

**Figure S28.** Graphical view of the macrocycle charges of Table S1 (left) and correlation chart between dihedral angles (Figure S27) and macrocycle charges (right).



**Table S3.** Computed molecular structures.

In all the cases, thiomethyl chains replaced the thioethyl and thiooctyl chains of the synthesized compounds. Structure optimizations at the B3LYP/6-31G(d) level of approximation. The reported structures are cartesian coordinates in angstrom.

**2 (free base, -H substituent)**

|   |                 |                 |                 |
|---|-----------------|-----------------|-----------------|
| C | 0.154877283905  | -0.165194302166 | -0.215414543551 |
| C | 0.064450237136  | -0.118650511016 | 1.225788444393  |
| N | 1.347449410541  | -0.071550355797 | 1.707431458953  |
| C | 2.263447159190  | -0.053152630250 | 0.681426421245  |
| C | 1.500416649717  | -0.113260119353 | -0.561772148983 |
| N | -1.060840174802 | -0.116784702087 | 1.923717155245  |
| C | -1.107259854195 | -0.079638991599 | 3.253587127152  |
| N | -0.054314808966 | -0.070313886198 | 4.117642247805  |
| C | -0.599343133026 | -0.090608487647 | 5.363716509130  |
| C | -2.078414145306 | -0.054883754022 | 5.308089873911  |
| C | -2.398989672376 | -0.048804628702 | 3.976747271103  |
| N | 0.047315532030  | -0.140718322585 | 6.528527601345  |
| C | 1.365618294497  | -0.151349123095 | 6.636179147986  |
| N | 2.288509884281  | -0.103383561976 | 5.623624579080  |
| C | 3.572697302302  | -0.093845069460 | 6.118369691141  |
| C | 3.457523762719  | -0.169685060864 | 7.573540761537  |
| C | 2.103563398625  | -0.212736142923 | 7.879219329889  |
| N | 4.689439069617  | -0.040390328756 | 5.423836694527  |
| C | 4.727591665131  | -0.003778436008 | 4.082908243426  |
| N | 3.663645976366  | -0.030743203734 | 3.225137532892  |
| C | 4.204813702748  | 0.009095483191  | 1.980888657450  |
| C | 5.680184467028  | 0.068997486804  | 2.045227943645  |
| C | 5.993842597841  | 0.061028428173  | 3.372586038397  |
| S | 6.667204980718  | 0.131782486901  | 0.604969150627  |
| C | 8.334933018077  | 0.212898023082  | 1.341742399619  |
| N | 3.575051694868  | -0.007406197744 | 0.801804302153  |
| S | 1.409183850291  | -0.210891535280 | 9.498405973879  |
| C | 0.330630280675  | -1.698622566349 | 9.451958638975  |
| S | 4.704045767301  | -0.176449389509 | 8.802572780356  |
| C | 6.291432663192  | -0.363578412836 | 7.912386370533  |
| S | -4.014340153788 | -0.146984412350 | 3.289715108307  |
| C | -3.995217477211 | 1.166237052729  | 2.004006564004  |
| S | -3.204126311617 | -0.160135719304 | 6.655005591332  |
| C | -2.599339757257 | 1.147011721684  | 7.796698489144  |
| S | 2.046143506602  | -0.115989746542 | -2.223983093381 |
| C | 3.873258671044  | -0.161189851419 | -2.161785986930 |
| S | -1.203204929144 | -0.164915946652 | -1.338839356055 |
| C | -2.108992500820 | -1.682606400756 | -0.834473357346 |
| H | 8.442599253595  | 1.106249498047  | 1.962780032363  |
| H | 9.039937295600  | 0.266434690065  | 0.508883776705  |
| H | 8.544667486872  | -0.681948783603 | 1.933895259657  |
| H | 4.237434050914  | -1.043445785113 | -1.635446555536 |
| H | 4.284030568056  | 0.734366862549  | -1.696927201825 |
| H | 4.169886128753  | -0.206314003377 | -3.213576024275 |
| H | -2.987097655637 | -1.735285686370 | -1.483813183255 |
| H | -2.423733400323 | -1.610293216119 | 0.207016761296  |
| H | -1.490181551894 | -2.568710998927 | -0.992376529567 |
| H | -4.985192190531 | 1.133650016187  | 1.540721742117  |
| H | -3.847819629024 | 2.146504973620  | 2.463567036200  |
| H | -3.225943723590 | 0.971493266841  | 1.257740890953  |
| H | -1.574205771653 | 0.949855030126  | 8.108021524611  |
| H | -2.677085617916 | 2.129847975823  | 7.325736264321  |
| H | -3.268049924380 | 1.110659389424  | 8.661140569468  |
| H | -0.148390948034 | -1.748861535789 | 10.433522072804 |
| H | 0.927532257968  | -2.599890550578 | 9.295705836027  |
| H | -0.427374558933 | -1.596668777216 | 8.674933140518  |
| H | 6.306174209737  | -1.271990097468 | 7.309460900150  |
| H | 6.502153338550  | 0.497459156020  | 7.280053777322  |
| H | 7.034562846283  | -0.436644923723 | 8.711622162117  |
| H | 6.960746787392  | 0.091557220604  | 3.853365383611  |
| H | 1.598031013631  | -0.056335037035 | 2.689350858457  |
| H | 2.061812771678  | -0.079933339172 | 4.636140106266  |

**3 (free base, -Br substituent)**

|   |                |                 |                |
|---|----------------|-----------------|----------------|
| C | 0.034728000844 | -0.067450361900 | 0.023511616169 |
| C | 0.029786685113 | -0.037309414937 | 1.467361379285 |
| N | 1.339454617597 | -0.002196104506 | 1.873283213341 |
| C | 2.193504080712 | 0.028958789076  | 0.795329979069 |

|    |                 |                 |                 |
|----|-----------------|-----------------|-----------------|
| C  | 1.357667240284  | -0.011310505083 | -0.401523004184 |
| N  | -1.052882084936 | -0.030190862818 | 2.229672483101  |
| C  | -1.023644342648 | -0.013043405983 | 3.560196493713  |
| N  | 0.076673148188  | -0.052434036041 | 4.362772336328  |
| C  | -0.397273177314 | -0.079790207595 | 5.637243729741  |
| C  | -1.874136492625 | 0.005429179109  | 5.667672169238  |
| C  | -2.270530994459 | 0.045182437419  | 4.357315227121  |
| N  | 0.313215324998  | -0.176121253240 | 6.762582794507  |
| C  | 1.633449486196  | -0.233577181847 | 6.790634632600  |
| N  | 2.490740911590  | -0.192974475730 | 5.721887115765  |
| C  | 3.802112263914  | -0.218802389457 | 6.135666938822  |
| C  | 3.780315340210  | -0.340212028657 | 7.590898761432  |
| C  | 2.449408270538  | -0.348925176881 | 7.985545790249  |
| N  | 4.874577035298  | -0.142260828876 | 5.378536560248  |
| C  | 4.837637992602  | -0.043633501997 | 4.047428537379  |
| N  | 3.739198318916  | -0.036613492857 | 3.243812964954  |
| C  | 4.211745778301  | 0.053538992692  | 1.974863636737  |
| C  | 5.691093937822  | 0.118814032999  | 1.940511301502  |
| C  | 6.061893185160  | 0.055297366353  | 3.254097356883  |
| S  | 6.487463109797  | 0.237121147568  | 0.386895897252  |
| C  | 8.261830256854  | 0.490212381962  | 0.753064115577  |
| N  | 3.510181207384  | 0.070751242044  | 0.838371235841  |
| S  | 1.862861561200  | -0.358927110517 | 9.645120229666  |
| C  | 0.645124960206  | -1.735956587993 | 9.618724930353  |
| S  | 5.134801098890  | -0.351169020662 | 8.701357271773  |
| C  | 6.501529391730  | -1.146117852207 | 7.771355860992  |
| S  | -3.925964052171 | 0.010504342322  | 3.767224006416  |
| C  | -3.936726721584 | 1.325011802234  | 2.482967243931  |
| S  | -2.920411911082 | -0.086723533419 | 7.078301499917  |
| C  | -2.223778577268 | 1.205059932460  | 8.184830101018  |
| S  | 1.800328456230  | 0.010668160710  | -2.093207082630 |
| C  | 3.627369648073  | -0.025455287174 | -2.144568459745 |
| S  | -1.387904069526 | -0.054416170188 | -1.016373640501 |
| C  | -2.274436383941 | -1.565209711713 | -0.459360209566 |
| H  | 8.421581926465  | 1.386668478906  | 1.353344549887  |
| H  | 8.723530127800  | 0.624333988522  | -0.228986511092 |
| H  | 8.702959883908  | -0.375015626018 | 1.247770410377  |
| H  | 4.027166350969  | -0.920577107433 | -1.668057035579 |
| H  | 4.062900264027  | 0.858159117194  | -1.679678689663 |
| H  | 3.858692869849  | -0.038804834848 | -3.213511914691 |
| H  | -3.186972254546 | -1.613055396656 | -1.059733955639 |
| H  | -2.531139194622 | -1.489722756133 | 0.597759447359  |
| H  | -1.670881883281 | -2.455432333334 | -0.649779752104 |
| H  | -4.954466488962 | 1.330682743209  | 2.083205195292  |
| H  | -3.723909414424 | 2.297894570493  | 2.932429671777  |
| H  | -3.224114671634 | 1.103272998853  | 1.689763577312  |
| H  | -1.184777949017 | 0.989276036712  | 8.431622828396  |
| H  | -2.313631628112 | 2.191104536472  | 7.722957613839  |
| H  | -2.837458452713 | 1.176376600221  | 9.089384137313  |
| H  | 0.219449373003  | -1.771292870198 | 10.625145607884 |
| H  | 1.145461034952  | -2.683447657352 | 9.406324731565  |
| H  | -0.140718028037 | -1.540848702495 | 8.889107272438  |
| H  | 6.208957866496  | -2.145525891876 | 7.441574220427  |
| H  | 6.816629294262  | -0.551118188078 | 6.916723150407  |
| H  | 7.311678970576  | -1.231232361642 | 8.500913281051  |
| Br | 7.766098258354  | 0.059849012965  | 4.056406540840  |
| H  | 1.646374516319  | 0.000606943105  | 2.838656222387  |
| H  | 2.195096818725  | -0.143149538912 | 4.754157844993  |

#### 4 (Ni complex, -Br substituent)

|   |                 |                 |                 |
|---|-----------------|-----------------|-----------------|
| C | 1.740788223909  | 3.883512411144  | 0.231257868844  |
| C | 1.833579226937  | 2.441000186077  | 0.104707369084  |
| N | 0.588197098495  | 1.866104007109  | 0.063931091759  |
| C | -0.307863315255 | 2.916427205998  | 0.093077323286  |
| C | 0.400784150705  | 4.193468933639  | 0.217496055535  |
| N | 3.000572268803  | 1.821352068032  | 0.015125409947  |
| C | 3.075224178417  | 0.512463156443  | -0.089172887808 |
| N | 2.031567519664  | -0.382871214455 | -0.051516757454 |
| C | 2.608980479182  | -1.629708862364 | -0.106132640960 |
| C | 4.061014216696  | -1.524652844282 | -0.259642407100 |
| C | 4.353404737740  | -0.185146649182 | -0.247677349048 |
| N | 1.997693319280  | -2.791912604893 | -0.017081334508 |
| C | 0.680215993369  | -2.870377199854 | 0.080480057314  |
| N | -0.211727515533 | -1.829401603556 | 0.055432930583  |
| C | -1.462782414775 | -2.412865089717 | 0.090067380344  |
| C | -1.352529624835 | -3.867011488148 | 0.212844876807  |
| C | -0.007397701203 | -4.147810312491 | 0.206601240822  |
| N | -2.618893311265 | -1.796033879379 | 0.005482775396  |

|    |                 |                 |                 |
|----|-----------------|-----------------|-----------------|
| C  | -2.690383665842 | -0.478429668141 | -0.066409890891 |
| N  | -1.654291433556 | 0.422588043898  | -0.021105529966 |
| C  | -2.233747906989 | 1.668421301386  | -0.062054361706 |
| C  | -3.685117938091 | 1.567726477745  | -0.156478202569 |
| C  | -3.948558390033 | 0.225473305686  | -0.149563034005 |
| S  | -4.765763602933 | 2.956784819258  | -0.186885295185 |
| C  | -5.769289060551 | 2.629050635308  | -1.689215261108 |
| N  | -1.616934665547 | 2.835916324518  | 0.010328174611  |
| S  | 0.737591762852  | -5.742502264723 | 0.189200884351  |
| C  | 1.934984500551  | -5.630650015699 | 1.579012033935  |
| S  | -2.632782777815 | -5.064267121992 | 0.213742416325  |
| C  | -4.018863351535 | -4.275129064736 | 1.121689494135  |
| S  | 5.956769840821  | 0.533200440766  | -0.255978282702 |
| C  | 5.802078715097  | 1.893779240805  | -1.481848455585 |
| S  | 5.216498176922  | -2.848919111818 | -0.290592835963 |
| C  | 4.524404481571  | -3.973763151516 | -1.568862202053 |
| S  | -0.219726457198 | 5.829399280777  | 0.241512122953  |
| C  | -1.969252169054 | 5.704861513858  | 0.768231362034  |
| S  | 3.087815956123  | 5.018355507841  | 0.243847035448  |
| C  | 4.045443201533  | 4.456331659407  | 1.708115125291  |
| H  | -5.136114252780 | 2.626618039852  | -2.579174815894 |
| H  | -6.480265437167 | 3.456997135752  | -1.752767628202 |
| H  | -6.313120184637 | 1.687329475531  | -1.606588172718 |
| H  | -2.055862543265 | 5.167772947908  | 1.714504557376  |
| H  | -2.590128617120 | 5.223691064986  | 0.015219301609  |
| H  | -2.277323519069 | 6.744498316874  | 0.911930840976  |
| H  | 4.910949459223  | 5.121485985700  | 1.772017862810  |
| H  | 4.380601969612  | 3.427162525114  | 1.575108501724  |
| H  | 3.448127130471  | 4.555334156589  | 2.617301779043  |
| H  | 6.792383650936  | 2.355441083895  | -1.523221609588 |
| H  | 5.554125882446  | 1.491438302608  | -2.466838507105 |
| H  | 5.060070730350  | 2.625658483788  | -1.165547224915 |
| H  | 3.538483148998  | -4.336399596958 | -1.280837526436 |
| H  | 4.484037059077  | -3.469950511393 | -2.537383407701 |
| H  | 5.228448501804  | -4.808191206745 | -1.628988586121 |
| H  | 2.440172975753  | -6.599776662054 | 1.612105218499  |
| H  | 1.410541638046  | -5.466880462601 | 2.523179666338  |
| H  | 2.662709422088  | -4.839602298216 | 1.397981659706  |
| H  | -3.694877495494 | -3.959732310406 | 2.116173586512  |
| H  | -4.433190973548 | -3.429398068841 | 0.576982991643  |
| H  | -4.764958364800 | -5.068175887581 | 1.223596176452  |
| Br | -5.608344787127 | -0.639990140036 | -0.169454353223 |
| Ni | 0.187636859546  | 0.019306253486  | 0.017365389023  |

### 5 (free base, -Ph-CF<sub>3</sub> substituent)

|   |                 |                 |                 |
|---|-----------------|-----------------|-----------------|
| C | -0.003747879835 | -0.003116423273 | 0.001038807460  |
| C | -0.001931097964 | 0.000457789673  | 1.446616365588  |
| N | 1.309637277461  | 0.006978679265  | 1.847543371196  |
| C | 2.159793087831  | 0.053186944096  | 0.766908173531  |
| C | 1.317674831578  | 0.039063428449  | -0.427748724953 |
| N | -1.080481167885 | 0.009646530456  | 2.213736640863  |
| C | -1.041992932696 | 0.007784203140  | 3.544678024165  |
| N | 0.063728028202  | -0.050193290916 | 4.337613995471  |
| C | -0.400709112963 | -0.089143597288 | 5.615325125463  |
| C | -1.876280697333 | 0.005772890237  | 5.658513575470  |
| C | -2.282379829537 | 0.065328578615  | 4.351798717290  |
| N | 0.318952998334  | -0.203571777069 | 6.732617267292  |
| C | 1.638881495325  | -0.266007717936 | 6.749970748428  |
| N | 2.491559539673  | -0.204429314211 | 5.678787347597  |
| C | 3.805368373244  | -0.239248971657 | 6.085476629080  |
| C | 3.789704078425  | -0.398067717052 | 7.536010346734  |
| C | 2.462513066212  | -0.411200882848 | 7.939426562549  |
| N | 4.876845854301  | -0.134807350902 | 5.326463258668  |
| C | 4.838933645937  | -0.006766175864 | 3.994111617424  |
| N | 3.730934173977  | -0.022184150026 | 3.203536508203  |
| C | 4.189611235007  | 0.081608474871  | 1.930237995462  |
| C | 5.661356358958  | 0.171913075804  | 1.896371621888  |
| C | 6.079103326402  | 0.107575957144  | 3.204661031197  |
| S | 6.505820955800  | 0.364378194005  | 0.364395859095  |
| C | 7.913061995784  | 1.464692300288  | 0.770221559805  |
| N | 3.474848591398  | 0.099476949280  | 0.799981465455  |
| S | 1.888020881645  | -0.458622124596 | 9.601855395450  |
| C | 0.625543801905  | -1.793792113444 | 9.549050351229  |
| S | 5.168212876683  | -0.431940741001 | 8.622303661984  |
| C | 6.371427318642  | -1.518187489036 | 7.759734005628  |
| S | -3.941818772931 | 0.051878519230  | 3.772553575608  |
| C | -3.951334052674 | 1.389390787582  | 2.511919321038  |
| S | -2.910313637838 | -0.093930822285 | 7.078015647843  |

|   |                 |                 |                 |
|---|-----------------|-----------------|-----------------|
| C | -2.204245146135 | 1.196959316916  | 8.179694958179  |
| S | 1.761600709126  | 0.105331596975  | -2.117909274415 |
| C | 3.570131604572  | -0.160950438527 | -2.178339388978 |
| S | -1.428807434878 | 0.061862052181  | -1.032731749065 |
| C | -2.354961727017 | -1.432637168795 | -0.496548693270 |
| H | 7.563399154020  | 2.333654899232  | 1.331992147383  |
| H | 8.305713876374  | 1.794772777848  | -0.195170922737 |
| H | 8.699015949240  | 0.952389727501  | 1.326540139383  |
| H | 3.846777408618  | -1.111284491584 | -1.720037887372 |
| H | 4.118163008228  | 0.647561255273  | -1.697487803185 |
| H | 3.795771639801  | -0.189165613140 | -3.248164795053 |
| H | -3.273679112528 | -1.441180959081 | -1.089215039596 |
| H | -2.599901466036 | -1.370543711637 | 0.564164930015  |
| H | -1.779917341594 | -2.336341378528 | -0.710151237243 |
| H | -4.971199772447 | 1.408655958930  | 2.118026402069  |
| H | -3.730056088419 | 2.352604263418  | 2.977819573774  |
| H | -3.244351447021 | 1.178166968477  | 1.710649984214  |
| H | -1.160096691960 | 0.985918082340  | 8.408461954255  |
| H | -2.307421152192 | 2.184546808998  | 7.723971209684  |
| H | -2.802077730487 | 1.160432021161  | 9.094483519052  |
| H | 0.222383861989  | -1.852775240501 | 10.563642670804 |
| H | 1.091503971371  | -2.747846901683 | 9.292229494598  |
| H | -0.170001105548 | -1.550584045417 | 8.845376855728  |
| H | 5.935934415174  | -2.504699391105 | 7.585288396666  |
| H | 6.704672901302  | -1.074702206484 | 6.823814492524  |
| H | 7.211658589422  | -1.614862144457 | 8.452583539165  |
| C | 7.436601772065  | 0.054720792998  | 3.771046279957  |
| C | 8.407155199888  | -0.796246280677 | 3.211429550239  |
| C | 9.688977875623  | -0.871493311252 | 3.748297760544  |
| C | 10.027295869962 | -0.093532976828 | 4.859271119839  |
| C | 9.074333989789  | 0.754497130141  | 5.429420330944  |
| C | 7.791828964076  | 0.826026926734  | 4.892121687220  |
| H | 8.145057426497  | -1.409246825723 | 2.354109578942  |
| H | 10.427063068913 | -1.532443845704 | 3.305411350433  |
| C | 11.394449382580 | -0.216940293732 | 5.473731691217  |
| H | 9.338946117718  | 1.365948518553  | 6.285821840242  |
| H | 7.057499686132  | 1.486055143490  | 5.339593539210  |
| H | 2.194627547235  | -0.133054660752 | 4.712784836003  |
| H | 1.619236936193  | -0.010812024993 | 2.811850930660  |
| F | 11.770234053756 | 0.918684027254  | 6.102523123510  |
| F | 11.441406625454 | -1.208781892164 | 6.395214811938  |
| F | 12.337953332208 | -0.500874629040 | 4.547662266962  |

## 6 (free base, -Ph-OCF<sub>3</sub> substituent)

|   |                 |                 |                 |
|---|-----------------|-----------------|-----------------|
| C | -0.038764237194 | 0.024100446286  | -0.001257729447 |
| C | -0.026600745559 | 0.009795800861  | 1.444479808637  |
| N | 1.288117491836  | 0.017924591118  | 1.835629989493  |
| C | 2.129851326077  | 0.080298894500  | 0.749589384819  |
| C | 1.279252576858  | 0.075663561113  | -0.439026140247 |
| N | -1.099246789080 | 0.001903662609  | 2.219408205149  |
| C | -1.051050297548 | -0.017132783801 | 3.550102797165  |
| N | 0.060577285868  | -0.075164061596 | 4.334320870979  |
| C | -0.394249498482 | -0.134249685411 | 5.614937242996  |
| C | -1.870012431692 | -0.054068916469 | 5.669431751436  |
| C | -2.285941625072 | 0.018618886839  | 4.366405337141  |
| N | 0.335068070905  | -0.254590892998 | 6.725470093218  |
| C | 1.655686194109  | -0.303467694121 | 6.732075048100  |
| N | 2.499217482920  | -0.220344657714 | 5.655094256587  |
| C | 3.816222735776  | -0.245697550557 | 6.051076170270  |
| C | 3.813824398234  | -0.420153330220 | 7.499341644416  |
| C | 2.490231938049  | -0.453706926659 | 7.913339272395  |
| N | 4.881569843009  | -0.123817221662 | 5.285458277108  |
| C | 4.833410833511  | 0.013997161931  | 3.954833245126  |
| N | 3.719574701276  | -0.004380375392 | 3.172269601858  |
| C | 4.169205912007  | 0.111018622243  | 1.896538595895  |
| C | 5.639826028641  | 0.213229881527  | 1.853216683637  |
| C | 6.067958940067  | 0.144898377272  | 3.157737672124  |
| S | 6.478425784728  | 0.418737286344  | 0.318609235688  |
| C | 7.850820864745  | 1.564182369809  | 0.720709052967  |
| N | 3.444943578045  | 0.133222731138  | 0.772303678004  |
| S | 1.928992491743  | -0.529953449157 | 9.579060425519  |
| C | 0.669810347888  | -1.867835727363 | 9.514506915533  |
| S | 5.203768194527  | -0.448517950346 | 8.571827877137  |
| C | 6.399032201572  | -1.533144362968 | 7.696022830505  |
| S | -3.948930613617 | -0.002388902115 | 3.797530409061  |
| C | -3.978865254862 | 1.353552203974  | 2.557099850349  |
| S | -2.892886058713 | -0.178978752745 | 7.095368615750  |
| C | -2.194858119793 | 1.112774420195  | 8.201034841417  |

|   |                 |                 |                 |
|---|-----------------|-----------------|-----------------|
| S | 1.712360966322  | 0.165083232865  | -2.130823306517 |
| C | 3.517487359201  | -0.122627289305 | -2.207548896467 |
| S | -1.471491467069 | 0.095505274077  | -1.024193707372 |
| C | -2.381065418405 | -1.416015900657 | -0.508271468560 |
| H | 7.472582589414  | 2.427128222061  | 1.273109439038  |
| H | 8.238960027304  | 1.897374160627  | -0.245467957312 |
| H | 6.648339078356  | 1.079996374343  | 1.285768594404  |
| H | 3.784480035503  | -1.083606683890 | -1.765714967261 |
| H | 4.079426813000  | 0.670785293682  | -1.717715816939 |
| H | 3.735733395144  | -0.137931526497 | -3.279166973353 |
| H | -3.302939907821 | -1.423292917429 | -1.096070370477 |
| H | -2.620875273149 | -1.373834970260 | 0.554529419622  |
| H | -1.799025348981 | -2.310766767123 | -0.739843874585 |
| H | -5.000487740240 | 1.367277603528  | 2.167533944713  |
| H | -3.766437875590 | 2.312170962819  | 3.036440685726  |
| H | -3.272856881866 | 1.162089404890  | 1.750016638644  |
| H | -1.146518562613 | 0.912990991610  | 8.420798205038  |
| H | -2.313279245146 | 2.102164636381  | 7.752975801911  |
| H | -2.785327578214 | 1.062836047242  | 9.119991491352  |
| H | 0.274688124895  | -1.943996218804 | 10.531120132424 |
| H | 1.136680906240  | -2.816336876461 | 9.239313211104  |
| H | -0.131676203103 | -1.616322604165 | 8.820471251648  |
| H | 5.965740883596  | -2.522659076611 | 7.533219642249  |
| H | 6.715362178266  | -1.092198624296 | 6.752865503648  |
| H | 7.250629330946  | -1.622421107829 | 8.375960806895  |
| C | 7.429666154402  | 0.104421601955  | 3.713591315832  |
| C | 8.410054845548  | -0.722560552307 | 3.140166755460  |
| C | 9.701617565552  | -0.799164978798 | 3.659834266374  |
| C | 10.024630793926 | -0.021130802183 | 4.771408809369  |
| C | 9.073966987687  | 0.806322722744  | 5.366344812512  |
| C | 7.785745513585  | 0.862161240777  | 4.844195399949  |
| H | 8.152802318879  | -1.333065266069 | 2.279539963020  |
| H | 10.428750609579 | -1.462203229752 | 3.208749443376  |
| O | 11.272665290057 | -0.023714477817 | 5.401286579021  |
| H | 9.356993503398  | 1.400292491288  | 6.229173425543  |
| H | 7.048494022509  | 1.503917509587  | 5.312787666118  |
| C | 12.390297077356 | -0.396624016757 | 4.731568736749  |
| H | 2.192717641926  | -0.140477268639 | 4.692743219334  |
| H | 1.606170562942  | -0.009693802413 | 2.796959134923  |
| F | 13.434519872919 | -0.111506644495 | 5.506901453402  |
| F | 12.416532983205 | -1.720717210574 | 4.463375517843  |
| F | 12.529985892567 | 0.248483077964  | 3.559205208689  |

### 7 (free base, -Ph-N(CH<sub>3</sub>)<sub>2</sub> substituent)

|   |                 |                 |                 |
|---|-----------------|-----------------|-----------------|
| C | -0.036740694252 | 0.061388295278  | -0.039112912823 |
| C | -0.065438624594 | 0.005230663173  | 1.406250056871  |
| N | 1.237803884486  | 0.032143935500  | 1.834649776746  |
| C | 2.108149957071  | 0.146226210494  | 0.775984953571  |
| C | 1.290888233503  | 0.156117751368  | -0.436521065074 |
| N | -1.158253537964 | -0.049700801804 | 2.148781948234  |
| C | -1.145435512588 | -0.110334364506 | 3.480383833459  |
| N | -0.054651846539 | -0.171721924535 | 4.291503919408  |
| C | -0.541223324413 | -0.283935434020 | 5.557541217493  |
| C | -2.018442378817 | -0.234478947313 | 5.574383435704  |
| C | -2.401144921461 | -0.126136529344 | 4.263287860796  |
| N | 0.161529424583  | -0.430494720145 | 6.681398856433  |
| C | 1.482557043848  | -0.452827595297 | 6.721229270803  |
| N | 2.352429432921  | -0.305480661313 | 5.671625515371  |
| C | 3.658609843410  | -0.323564546517 | 6.100535207230  |
| C | 3.622502683926  | -0.563496928546 | 7.538033041899  |
| C | 2.289412175013  | -0.639170978561 | 7.915449581184  |
| N | 4.742177090264  | -0.144973870264 | 5.370716274340  |
| C | 4.727804030387  | 0.047665676865  | 4.046971257219  |
| N | 3.635675265536  | 0.024866231676  | 3.234822220338  |
| C | 4.118961211368  | 0.191944221390  | 1.975108450686  |
| C | 5.582877490983  | 0.335337693812  | 1.974240437526  |
| C | 5.984190031404  | 0.242689594226  | 3.287950375409  |
| S | 6.474495775665  | 0.614365656561  | 0.476674516381  |
| C | 7.653945045879  | 1.940422954471  | 0.937389000750  |
| N | 3.420032118808  | 0.229200081694  | 0.834373509386  |
| S | 1.687618599411  | -0.800934957613 | 9.561439781200  |
| C | 0.462931719899  | -2.162927826656 | 9.405147536441  |
| S | 4.986341883455  | -0.621766403585 | 8.643155557891  |
| C | 6.226476020324  | -1.631842603533 | 7.740563935577  |

|   |                 |                 |                 |
|---|-----------------|-----------------|-----------------|
| S | -4.048093932695 | -0.158836301867 | 3.647902792389  |
| C | -4.070609022055 | 1.243827644673  | 2.460442650227  |
| S | -3.075676390365 | -0.427444219013 | 6.967832632879  |
| C | -2.429232100102 | 0.835700909762  | 8.136158585451  |
| S | 1.773211599189  | 0.312486992215  | -2.110987142085 |
| C | 3.579797779517  | 0.023361170324  | -2.145710975687 |
| S | -1.442050242253 | 0.130173786834  | -1.099518663427 |
| C | -2.341684585274 | -1.404499248741 | -0.636982704983 |
| H | 7.119847464549  | 2.781500648792  | 1.385097193192  |
| H | 8.111342815914  | 2.262570558170  | -0.002102870419 |
| H | 8.429132462024  | 1.584501390163  | 1.617747010310  |
| H | 3.831322949252  | -0.953932595681 | -1.731150831358 |
| H | 4.128728254294  | 0.796002903317  | -1.610498217321 |
| H | 3.829035852952  | 0.045057213518  | -3.210527649859 |
| H | -3.248092864662 | -1.413640809338 | -1.248395170933 |
| H | -2.608480623965 | -1.387083039413 | 0.420097006498  |
| H | -1.740220344305 | -2.285728309880 | -0.871034688799 |
| H | -5.080755161162 | 1.254173618605  | 2.041790976250  |
| H | -3.890237260650 | 2.186872100047  | 2.982037384475  |
| H | -3.338184849378 | 1.096828046138  | 1.667549173047  |
| H | -1.383099021874 | 0.645998664488  | 8.374578019000  |
| H | -2.554279199382 | 1.838453869119  | 7.720657757607  |
| H | -3.040920737846 | 0.742669929089  | 9.03776573182   |
| H | 0.043008643816  | -2.293361126397 | 10.406250224396 |
| H | 0.959022974530  | -3.087481057093 | 9.100899204575  |
| H | -0.325689466414 | -1.898466347608 | 8.701225617129  |
| H | 5.808639934340  | -2.608959028411 | 7.487469057008  |
| H | 6.578713802522  | -1.121468222419 | 6.846392815225  |
| H | 7.049116466305  | -1.767123036718 | 8.448227413529  |
| C | 7.327799838465  | 0.244263014558  | 3.872787212026  |
| C | 8.389462694883  | -0.440811616370 | 3.252927154673  |
| C | 9.666131510552  | -0.466004956001 | 3.797301328382  |
| C | 9.959791770512  | 0.215194619366  | 5.003349566698  |
| C | 8.891011055881  | 0.896082735312  | 5.633517642324  |
| C | 7.617240670928  | 0.905848710215  | 5.080684208237  |
| H | 8.202272217175  | -0.982486070433 | 2.329994499278  |
| H | 10.436728229587 | -1.027951417609 | 3.283152628880  |
| N | 11.236271825720 | 0.221055503920  | 5.538443849967  |
| H | 9.053121283612  | 1.429274455229  | 6.562579478023  |
| H | 6.827813046731  | 1.441281505030  | 5.596364370050  |
| C | 11.461641679196 | 0.789493391174  | 6.856802381804  |
| C | 12.269557160594 | -0.613243281625 | 4.948864530904  |
| H | 13.208393276658 | -0.448867484394 | 5.480741857053  |
| H | 12.029139137357 | -1.686813546940 | 4.999519007413  |
| H | 12.435219709216 | -0.352772203925 | 3.896278129510  |
| H | 12.522937360186 | 0.716834551129  | 7.100908623718  |
| H | 11.186828982371 | 1.851236927759  | 6.882757110850  |
| H | 10.891599440313 | 0.272166936275  | 7.644097185874  |
| H | 2.072084374040  | -0.192067376102 | 4.704685638868  |
| H | 1.529831856143  | -0.020194793095 | 2.803202406076  |

### 8 (Ni complex, -Ph-N(CH<sub>3</sub>)<sub>2</sub> substituent)

|   |                 |                 |                 |
|---|-----------------|-----------------|-----------------|
| C | 1.740788223909  | 3.883512411144  | 0.231257868844  |
| C | 1.833579226937  | 2.441000186077  | 0.104707369084  |
| N | 0.588197098495  | 1.866104007109  | 0.063931091759  |
| C | -0.307863315255 | 2.916427205998  | 0.093077323286  |
| C | 0.400784150705  | 4.193468933639  | 0.217496055535  |
| N | 3.000572268803  | 1.821352068032  | 0.015125409947  |
| C | 3.075224178417  | 0.512463156443  | -0.089172887808 |
| N | 2.031567519664  | -0.382871214455 | -0.051516757454 |
| C | 2.608980479182  | -1.629708862364 | -0.106132640960 |
| C | 4.061014216696  | -1.524652844282 | -0.259642407100 |
| C | 4.353404737740  | -0.185146649182 | -0.247677349048 |
| N | 1.997693319280  | -2.791912604893 | -0.017081334508 |
| C | 0.680215993369  | -2.870377199854 | 0.080480057314  |
| N | -0.211727515533 | -1.829401603556 | 0.055432930583  |
| C | -1.462782414775 | -2.412865089717 | 0.090067380344  |
| C | -1.352529624835 | -3.867011488148 | 0.212844876807  |
| C | -0.007397701203 | -4.147810312491 | 0.206601240822  |
| N | -2.618893311265 | -1.796033879379 | 0.005482775396  |
| C | -2.690383665842 | -0.478429668141 | -0.066409890891 |
| N | -1.654291433556 | 0.422588043898  | -0.021105529966 |
| C | -2.233747906989 | 1.668421301386  | -0.062054361706 |
| C | -3.685117938091 | 1.567726477745  | -0.156478202569 |
| C | -3.948558390033 | 0.225473305686  | -0.149563034005 |
| S | -4.765763602933 | 2.956784819258  | -0.186885295185 |
| C | -5.769289060551 | 2.629050635308  | -1.689215261108 |
| N | -1.616934665547 | 2.835916324518  | 0.010328174611  |

|    |                 |                 |                 |
|----|-----------------|-----------------|-----------------|
| S  | 0.737591762852  | -5.742502264723 | 0.189200884351  |
| C  | 1.934984500551  | -5.630650015699 | 1.579012033935  |
| S  | -2.632782777815 | -5.064267121992 | 0.213742416325  |
| C  | -4.018863351535 | -4.275129064736 | 1.121689494135  |
| S  | 5.956769840821  | 0.533200440766  | -0.255978282702 |
| C  | 5.802078715097  | 1.893779240805  | -1.481848455585 |
| S  | 5.216498176922  | -2.848919111818 | -0.290592835963 |
| C  | 4.524404481571  | -3.973763151516 | -1.568862202053 |
| S  | -0.219726457198 | 5.829399280777  | 0.241512122953  |
| C  | -1.969252169054 | 5.704861513858  | 0.768231362034  |
| S  | 3.087815956123  | 5.018355507841  | 0.243847035448  |
| C  | 4.045443201533  | 4.456331659407  | 1.708115125291  |
| H  | -5.136114252780 | 2.626618039852  | -2.579174815894 |
| H  | -6.480265437167 | 3.456997135752  | -1.752767628202 |
| H  | -6.313120184637 | 1.687329475531  | -1.606588172718 |
| H  | -2.055862543265 | 5.167772947908  | 1.714504557376  |
| H  | -2.590128617120 | 5.223691064986  | 0.015219301609  |
| H  | -2.277323519069 | 6.744498316874  | 0.911930840976  |
| H  | 4.910949459223  | 5.121485985700  | 1.772017862810  |
| H  | 4.380601969612  | 3.427162525114  | 1.575108501724  |
| H  | 3.448127130471  | 4.555334156589  | 2.617301779043  |
| H  | 6.792383650936  | 2.355441083895  | -1.523221609588 |
| H  | 5.554125882446  | 1.491438302608  | -2.466838507105 |
| H  | 5.060070730350  | 2.625658483788  | -1.165547224915 |
| H  | 3.538483148998  | -4.336399596958 | -1.280837526436 |
| H  | 4.484037059077  | -3.469950511393 | -2.537383407701 |
| H  | 5.228448501804  | -4.808191206745 | -1.628988586121 |
| H  | 2.440172975753  | -6.599776662054 | 1.612105218499  |
| H  | 1.410541638046  | -5.466880462601 | 2.523179666338  |
| H  | 2.662709422088  | -4.839602298216 | 1.397981659706  |
| H  | -3.694877495494 | -3.959732310406 | -2.116173586512 |
| H  | -4.433190973548 | -3.429398068841 | 0.576982991643  |
| H  | -4.764958364800 | -5.068175887581 | 1.223596176452  |
| Br | -5.608344787127 | -0.639990140036 | -0.169454353223 |
| Ni | 0.187636859546  | 0.019306253486  | 0.017365389023  |

### 9 (Ni complex, -CC-Ph substituent)

|    |                 |                 |                 |
|----|-----------------|-----------------|-----------------|
| N  | 1.576137866986  | 1.625640672603  | -0.028565451104 |
| C  | 0.972422981329  | 2.856131104008  | 0.059888039459  |
| C  | 2.924328434941  | 1.878771399407  | -0.050444962811 |
| C  | 1.960702586138  | 3.924770527708  | 0.140046380414  |
| C  | 3.190948418795  | 3.311652875269  | 0.069905479960  |
| N  | -0.324112660559 | 3.107382758000  | 0.028026812805  |
| N  | 3.901759966634  | 1.001277391552  | -0.176085498117 |
| C  | -1.210426883827 | 2.135332679228  | -0.044676150709 |
| C  | 3.659072281720  | -0.292212287278 | -0.253332922797 |
| C  | -2.641312331934 | 2.391138011215  | -0.108093349939 |
| C  | 4.718336353783  | -1.288533949921 | -0.414015438831 |
| C  | -3.256032977438 | 1.156100243424  | -0.078385389239 |
| C  | 4.093817366279  | -2.515920940653 | -0.385219060030 |
| C  | -2.179666760742 | 0.167080287934  | -0.022341494110 |
| C  | 2.677338392633  | -2.255699710137 | -0.232493543412 |
| N  | 2.427417818723  | -0.904963377328 | -0.175245243865 |
| N  | -0.954675084080 | 0.778557972157  | -0.028967304347 |
| N  | -2.435400842593 | -1.126038958879 | 0.033485937612  |
| N  | 1.790277033032  | -3.233666786560 | -0.146779051540 |
| C  | 0.503938962055  | -2.990359166240 | -0.033335824162 |
| C  | -1.458471327634 | -2.012413372758 | 0.050262988584  |
| C  | -0.486194162564 | -4.061649703829 | 0.093043297349  |
| C  | -1.712985941208 | -3.445182450102 | 0.146126610469  |
| N  | -0.108838746769 | -1.756042697239 | -0.021088112080 |
| Ni | 0.736233850483  | -0.064893804304 | -0.061507624109 |
| S  | 1.559664582004  | 5.642576591649  | 0.102082748496  |
| S  | 4.856445333755  | 3.864549726632  | 0.056500723579  |
| S  | 6.448074303630  | -1.105524178892 | -0.593388231537 |
| S  | -3.454666488007 | 3.945895360676  | -0.069820822164 |
| S  | 4.808443647736  | -4.120384424605 | -0.555004519369 |
| S  | -3.270517141046 | -4.258805974228 | 0.153750039243  |
| S  | -0.241150076454 | -5.796281348777 | 0.027619587847  |
| C  | 4.834260095781  | 5.453116633189  | 0.963855020001  |
| C  | 0.536900537470  | 5.844361822033  | 1.615180987281  |
| H  | 5.889404389078  | 5.700116253441  | 1.110856607081  |
| H  | 4.341068146044  | 6.244894229801  | 0.401493898931  |
| H  | 4.353836002934  | 5.334297510812  | 1.937237140135  |
| H  | 0.245685546489  | 6.898101417256  | 1.641680506860  |
| H  | -0.353110254993 | 5.217369912691  | 1.557168871371  |
| H  | 1.118078731191  | 5.609000557410  | 2.510199944592  |
| C  | -2.578152987082 | 4.907148556298  | -1.367719811924 |

|   |                  |                 |                 |
|---|------------------|-----------------|-----------------|
| H | -3.064138250623  | 5.886573079373  | -1.380993524792 |
| H | -1.521530402475  | 5.016502857731  | -1.126047825056 |
| H | -2.704391952331  | 4.431081884656  | -2.342905381376 |
| C | -4.249212125379  | -3.305114836221 | 1.380115568776  |
| C | 1.368031606051   | -6.083037752514 | 0.861121608118  |
| H | -5.198245072008  | -3.841361715301 | 1.468477744101  |
| H | -3.749408427727  | -3.303444024989 | 2.351629303725  |
| H | -4.418542055571  | -2.286200016086 | 1.034974444447  |
| H | 1.446675363538   | -7.171326967468 | 0.936295457205  |
| H | 2.196604324055   | -5.677451687677 | 0.283533386587  |
| H | 1.360307051179   | -5.654320626363 | 1.865956874385  |
| C | 5.748405100454   | -4.277437151281 | 1.017696304524  |
| C | 6.788287379637   | 0.681125648404  | -0.770548893314 |
| H | 6.242601293074   | -5.251967757685 | 0.974068233697  |
| H | 6.505880035078   | -3.496443626473 | 1.111994179362  |
| H | 5.072095130230   | -4.253729756233 | 1.875273636281  |
| H | 7.867151531932   | 0.725269444417  | -0.945798288688 |
| H | 6.259831007074   | 1.103483722428  | -1.625558795348 |
| H | 6.528742785053   | 1.236996781745  | 0.128709938569  |
| C | -4.625158253983  | 0.846288411827  | -0.104040893024 |
| C | -5.815652344236  | 0.591391245206  | -0.134509115462 |
| C | -7.208676144188  | 0.308533862328  | -0.176143063117 |
| C | -7.669013502007  | -1.018580124351 | -0.299505196104 |
| C | -9.034090535427  | -1.286345153588 | -0.338861711642 |
| C | -9.959843993037  | -0.242694594092 | -0.256628792369 |
| C | -9.513392299306  | 1.076110303518  | -0.135826663603 |
| C | -8.150661092628  | 1.355085565596  | -0.095987386294 |
| H | -6.945547970914  | -1.824973731254 | -0.368079198791 |
| H | -9.377850023626  | -2.312550121646 | -0.435669279065 |
| H | -11.024749636846 | -0.456101041450 | -0.288026284758 |
| H | -10.230551202178 | 1.889997253915  | -0.073126115824 |
| H | -7.796999300602  | 2.377211268292  | -0.003578080311 |

## 10 (Ni complex, -CC-Ph-NO<sub>2</sub> substituent)

|    |                 |                 |                 |
|----|-----------------|-----------------|-----------------|
| N  | 2.216867893224  | 1.598900772823  | -0.021804502745 |
| C  | 1.644582882517  | 2.845093504022  | 0.071934680417  |
| C  | 3.569226531334  | 1.818971936297  | -0.051370517939 |
| C  | 2.659347538636  | 3.888594987875  | 0.151610010965  |
| C  | 3.873450997119  | 3.245107564354  | 0.071622598974  |
| N  | 0.355102724602  | 3.127143935255  | 0.045223108214  |
| N  | 4.525027229793  | 0.918268129438  | -0.186674246278 |
| C  | -0.555081978263 | 2.176646817457  | -0.023366526020 |
| C  | 4.250458885532  | -0.368008396073 | -0.266285455707 |
| C  | -1.979824518122 | 2.467297931409  | -0.076585937868 |
| C  | 5.284259906577  | -1.389837394552 | -0.441584636942 |
| C  | -2.622061480843 | 1.244966913304  | -0.035737785814 |
| C  | 4.629838543196  | -2.601297077414 | -0.414096613344 |
| C  | -1.572405131633 | 0.231298784441  | 0.014897702844  |
| C  | 3.221328839801  | -2.306749786063 | -0.246211982578 |
| N  | 3.004882370845  | -0.950580601731 | -0.179848314710 |
| N  | -0.334173649514 | 0.814072391866  | -0.004689671901 |
| N  | -1.859345433037 | -1.055873851146 | 0.077167651133  |
| N  | 2.311962576653  | -3.262953605690 | -0.154261354629 |
| C  | 1.033073038584  | -2.988654050955 | -0.025120812639 |
| C  | -0.904482710887 | -1.965106939212 | 0.083653315518  |
| C  | 0.018944406991  | -4.037160930837 | 0.111111727671  |
| C  | -1.191715173429 | -3.391479308238 | 0.180949409511  |
| N  | 0.450809841624  | -1.740642240229 | -0.003410817140 |
| Ni | 1.335903362921  | -0.070258955643 | -0.049908480107 |
| S  | 2.292580980471  | 5.615006512648  | 0.134936903929  |
| S  | 5.555611355887  | 3.739980586257  | 0.050715484750  |
| S  | 7.014644103022  | -1.248581920604 | -0.643430747228 |
| S  | -2.764801472239 | 4.033974251044  | -0.039526520824 |
| S  | 5.300154334234  | -4.222661833083 | -0.600987317559 |
| S  | -2.769677362157 | -4.164461520760 | 0.207391496967  |
| S  | 0.220346992059  | -5.776455178029 | 0.040130417146  |
| C  | 5.586392557759  | 5.386540011771  | 0.845582656233  |
| C  | 1.313953920885  | 5.822856416636  | 1.676187057137  |
| H  | 6.650061968960  | 5.606754314378  | 0.972683116631  |
| H  | 5.119530171477  | 6.153506266222  | 0.228969924845  |
| H  | 5.106090453807  | 5.354521314790  | 1.825366119316  |
| H  | 1.043265911518  | 6.881492869472  | 1.719401045357  |
| H  | 0.410564422623  | 5.213540324288  | 1.636895837000  |
| H  | 1.913229586224  | 5.568632992747  | 2.553866274860  |
| C  | -1.834655920864 | 5.010425889375  | -1.287648794870 |
| H  | -2.308592427699 | 5.995696196155  | -1.291896400190 |
| H  | -0.784512025191 | 5.098822708928  | -1.013077295579 |
| H  | -1.938857873738 | 4.557888228518  | -2.276434754056 |



|   |                  |                 |                 |
|---|------------------|-----------------|-----------------|
| C | -3.687189244709  | -3.211949337185 | 1.481134295550  |
| C | 1.837439773029   | -6.105514509304 | 0.842024640964  |
| H | -4.652297686501  | -3.717012590496 | 1.578566585252  |
| H | -3.165936096884  | -3.253268876293 | 2.440386789336  |
| H | -3.828396358714  | -2.178939195122 | 1.165972893545  |
| H | 1.887217610086   | -7.195474825393 | 0.917073385124  |
| H | 2.665690183198   | -5.723759616695 | 0.248119556097  |
| H | 1.861006945488   | -5.676063003540 | 1.846236732044  |
| C | 6.269252965661   | -4.407370171799 | 0.950866568882  |
| C | 7.403440289911   | 0.532047258949  | -0.773332000090 |
| H | 6.736226184978   | -5.394512874185 | 0.894278611449  |
| H | 7.049064376338   | -3.647074180250 | 1.030266218383  |
| H | 5.612245433005   | -4.368172734871 | 1.822688009434  |
| H | 8.482345536561   | 0.550560358423  | -0.952581389688 |
| H | 6.883114597017   | 0.993244361260  | -1.612935660564 |
| H | 7.164442580602   | 1.069111223693  | 0.143029560317  |
| C | -3.998954516720  | 0.972198647594  | -0.055155474780 |
| C | -5.196352401358  | 0.751692656745  | -0.081199546856 |
| C | -6.593573030365  | 0.507454130885  | -0.119263034659 |
| C | -7.089888218504  | -0.810990452039 | -0.219750628460 |
| C | -8.456665055058  | -1.049126328323 | -0.255476391085 |
| C | -9.332420001911  | 0.035196584327  | -0.190761890868 |
| C | -8.874484713310  | 1.349664050785  | -0.093514392138 |
| C | -7.507009699385  | 1.583210821099  | -0.058379010453 |
| H | -6.390173242576  | -1.638214053884 | -0.273659630604 |
| H | -8.855817281163  | -2.052816880088 | -0.333498789803 |
| N | -10.778825311116 | -0.214129273681 | -0.226215773408 |
| H | -9.590089270345  | 2.161162719621  | -0.047135623731 |
| H | -7.127080006180  | 2.596582637849  | 0.016143688639  |
| O | -11.529229220942 | 0.761119513757  | -0.172592402491 |
| O | -11.156383294393 | -1.383686015289 | -0.306738940984 |

### 11 (Ni complex, -CC-Ph-N(CH<sub>3</sub>)<sub>2</sub> substituent)

|    |                 |                 |                 |
|----|-----------------|-----------------|-----------------|
| N  | 2.289610717935  | 1.598394177009  | 0.002645623317  |
| C  | 1.720553682050  | 2.845536419054  | 0.085992766425  |
| C  | 3.646358334549  | 1.813021096124  | -0.014329021894 |
| C  | 2.739598553140  | 3.881245565408  | 0.195183184854  |
| C  | 3.950191678222  | 3.237434252067  | 0.106146025613  |
| N  | 0.431595779621  | 3.135970279186  | 0.062241878783  |
| N  | 4.598170125589  | 0.906190990432  | -0.119871214663 |
| C  | -0.484457837894 | 2.190762421632  | 0.000650329340  |
| C  | 4.317166627508  | -0.380269048084 | -0.195676269584 |
| C  | -1.905483014200 | 2.488579858437  | -0.048069704614 |
| C  | 5.346709940701  | -1.403860391843 | -0.364004582309 |
| C  | -2.558790149413 | 1.272424126230  | -0.020466257022 |
| C  | 4.683274191372  | -2.610382683458 | -0.398408598421 |
| C  | -1.508087662564 | 0.251035835618  | 0.020653709665  |
| C  | 3.273435590100  | -2.310461619198 | -0.248685787934 |
| N  | 3.066424952445  | -0.956122013764 | -0.140183694783 |
| N  | -0.265955500030 | 0.825691801496  | 0.008792229553  |
| N  | -1.801554933006 | -1.033923977489 | 0.065655756895  |
| N  | 2.356928420501  | -3.263551146848 | -0.191245615324 |
| C  | 1.079880268251  | -2.984926108503 | -0.059511407424 |
| C  | -0.850479617826 | -1.949106681528 | 0.062977043986  |
| C  | 0.058695791111  | -4.027574168261 | 0.053126802623  |
| C  | -1.147842623210 | -3.375410085104 | 0.133543434553  |
| N  | 0.504626867856  | -1.732597444446 | -0.014305385874 |
| Ni | 1.399764834174  | -0.066779368205 | -0.030161105359 |
| S  | 2.403132753999  | 5.608575081335  | 0.347978040764  |
| S  | 5.622288829629  | 3.776312373132  | 0.160178331671  |
| S  | 7.073205049537  | -1.243532802777 | -0.610697578939 |
| S  | -2.667206617005 | 4.070132442396  | 0.010956595661  |
| S  | 5.336338518808  | -4.234427918674 | -0.632269418321 |
| S  | -2.730218579643 | -4.139720324063 | 0.142180606314  |
| S  | 0.252152198511  | -5.767259570948 | -0.053550117618 |
| C  | 5.608553255752  | 5.407219853921  | -0.676733370416 |
| C  | 1.366536925204  | 5.661772040050  | 1.863863807424  |
| H  | 6.660601143562  | 5.636688501434  | -0.868339794458 |
| H  | 5.079306005631  | 5.340389184920  | -1.630172601400 |
| H  | 5.167074996683  | 6.183780680272  | -0.054061406993 |
| H  | 1.151869676513  | 6.719818581550  | 2.038098273210  |
| H  | 0.435931713814  | 5.115359717099  | 1.709584592759  |
| H  | 1.916495609999  | 5.260463204366  | 2.718133489240  |
| C  | -1.796734162612 | 4.996424202979  | -1.315822104347 |
| H  | -2.251721858799 | 5.990751411981  | -1.325067053495 |
| H  | -0.731751207364 | 5.075092426899  | -1.099346208375 |
| H  | -1.960297486542 | 4.517938844238  | -2.284378733777 |
| C  | -3.668217189665 | -3.173078855659 | 1.390126395057  |
| C  | 1.848590038873  | -6.118706248965 | 0.779984518296  |

|   |                  |                 |                 |
|---|------------------|-----------------|-----------------|
| H | -4.633298630161  | -3.679878716591 | 1.479054827404  |
| H | -3.160774210732  | -3.201370493118 | 2.357306737972  |
| H | -3.807149626320  | -2.144370313333 | 1.060787655010  |
| H | 1.899631146419   | -7.210282279367 | 0.826065370689  |
| H | 2.690046796099   | -5.718831511727 | 0.217247007169  |
| H | 1.845921778458   | -5.717246983163 | 1.796107473953  |
| C | 6.322393733699   | -4.457675978544 | 0.902588979488  |
| C | 7.54055570099    | 0.414565100784  | 0.005021191199  |
| H | 6.782529205870   | -5.446354795615 | 0.821300395708  |
| H | 7.105518487518   | -3.701054970821 | 0.982719892414  |
| H | 5.675966516395   | -4.430982981892 | 1.782818868636  |
| H | 8.632990982235   | 0.420166124237  | -0.051321277747 |
| H | 7.123438088810   | 1.210339367648  | -0.608788715866 |
| H | 7.228230305910   | 0.552668537786  | 1.041291131806  |
| C | -3.932469494657  | 0.999055013627  | -0.032519097537 |
| C | -5.131363805849  | 0.773572917236  | -0.051579009178 |
| C | -6.525139889336  | 0.527761361897  | -0.079884970321 |
| C | -7.038816660584  | -0.779069997117 | -0.216318170781 |
| C | -8.402148267703  | -1.019995813675 | -0.247475705843 |
| C | -9.336307564267  | 0.040715526286  | -0.137290686123 |
| C | -8.818341197936  | 1.354097682033  | -0.007874526942 |
| C | -7.453422249607  | 1.585656233046  | 0.020401909649  |
| H | -6.346966026603  | -1.611101662860 | -0.306383826339 |
| H | -8.745663178131  | -2.041131523220 | -0.360267722634 |
| N | -10.695655292418 | -0.196283922328 | -0.153045021304 |
| H | -9.489154172965  | 2.201187466084  | 0.068310294261  |
| H | -7.084363187108  | 2.602067174015  | 0.118959915590  |
| C | -11.628498905949 | 0.917757237480  | -0.121355089254 |
| C | -11.196903756609 | -1.539245986042 | -0.393708474823 |
| H | -12.287429630141 | -1.525561167828 | -0.360827285032 |
| H | -10.889120493936 | -1.928802129449 | -1.375381054145 |
| H | -10.847705362811 | -2.241088128738 | 0.374847387966  |
| H | -12.648517452569 | 0.530376829874  | -0.112257233400 |
| H | -11.493501090585 | 1.525764643956  | 0.782486105180  |
| H | -11.520976135424 | 1.578264234391  | -0.994760674777 |

## 12 (Ni complex, -CC-Ph-OH substituent)

|    |                 |                 |                 |
|----|-----------------|-----------------|-----------------|
| C  | -5.929485000201 | 1.309450349542  | 0.569465474006  |
| C  | -4.967731163793 | 0.579637722831  | -0.151328177492 |
| C  | -5.414794262747 | -0.520367653563 | -0.914191287235 |
| C  | -6.758541267826 | -0.864242413539 | -0.965390307443 |
| C  | -7.699422941247 | -0.119015821002 | -0.243897700512 |
| C  | -7.278101141758 | 0.967825533644  | 0.528568898948  |
| C  | -3.554627311501 | 0.966718196848  | -0.123039631639 |
| C  | -2.985758544612 | 2.219577351529  | -0.129476721639 |
| C  | -1.541467117891 | 2.028913672976  | -0.051378611226 |
| N  | -1.225001764373 | 0.689240522049  | -0.049816949909 |
| C  | -2.428109121860 | 0.029001303332  | -0.064723214916 |
| N  | -0.703109905721 | 3.040979327196  | 0.032872970301  |
| C  | 0.604703391822  | 2.851444407968  | 0.066440853987  |
| N  | 1.265809953219  | 1.652677125738  | -0.022663234471 |
| C  | 2.602100070084  | 1.969263183827  | -0.039133510870 |
| C  | 2.798995739304  | 3.412752417097  | 0.083695045443  |
| C  | 1.540655769306  | 3.966183793356  | 0.150820864142  |
| Ni | 0.505095767880  | -0.074285290137 | -0.065172335891 |
| N  | -0.259344127443 | -1.801051933604 | -0.032266360383 |
| C  | 0.409596558793  | -3.006529425073 | -0.031778836315 |
| C  | -0.534546991927 | -4.120956291409 | 0.086881011762  |
| C  | -1.787249739031 | -3.557550610609 | 0.122310350334  |
| C  | -1.595445574614 | -2.116977299086 | 0.026798652241  |
| N  | 3.618960004164  | 1.138880522302  | -0.160191443528 |
| C  | 3.437153351895  | -0.165459981259 | -0.237286242001 |
| C  | 4.542082817121  | -1.110860961064 | -0.388304134106 |
| C  | 3.975460590064  | -2.366457105853 | -0.358178450776 |
| C  | 2.548304325893  | -2.172695953351 | -0.214838610212 |
| N  | 2.235054830971  | -0.834652387371 | -0.164589701306 |
| S  | 1.064870371465  | 5.664066819198  | 0.104303129182  |
| C  | -0.009538201327 | 5.820376765400  | 1.586653751241  |
| S  | 4.433460164167  | 4.053387155943  | 0.075485746390  |
| C  | 4.332016927374  | 5.603701548191  | 1.042559491444  |
| S  | -3.806029964543 | 3.780193016398  | -0.156414898970 |
| C  | -2.956913711289 | 4.664756235960  | -1.525327027174 |
| S  | 6.263387681711  | -0.849232041408 | -0.552567755987 |
| C  | 6.519316466373  | 0.948744312393  | -0.757247781768 |
| S  | 4.770200133997  | -3.934079038695 | -0.519341108803 |
| C  | 5.673307245386  | -4.056925989649 | 1.077916116118  |
| N  | -2.613230938787 | -1.275970248234 | -0.001354625728 |
| N  | 1.706285474286  | -3.190577405402 | -0.131414562198 |
| S  | -0.220192453898 | -5.844267119986 | 0.041377757652  |

|   |                 |                 |                 |
|---|-----------------|-----------------|-----------------|
| C | 1.429233254933  | -6.057201883063 | 0.815039647254  |
| S | -3.317866620983 | -4.425182400641 | 0.110346519359  |
| C | -4.257019816039 | -3.617894322305 | 1.466643305819  |
| O | -9.006213222762 | -0.503770707769 | -0.328189439790 |
| H | 5.373081032712  | 5.899606732089  | 1.199197620666  |
| H | 3.796954889623  | 6.389785641149  | 0.511225590656  |
| H | 3.860326467603  | 5.422543297698  | 2.010712853872  |
| H | -0.342758456049 | 6.861771593962  | 1.605175096614  |
| H | -0.871310320423 | 5.158117845820  | 1.500983999003  |
| H | 0.554751959711  | 5.606753684911  | 2.497859323761  |
| H | -3.476561105261 | 5.622481076793  | -1.618452370769 |
| H | -1.906000248782 | 4.830240716164  | -1.290384283789 |
| H | -3.063080333623 | 4.108051214846  | -2.459323944462 |
| H | -5.201746651186 | -4.164435166063 | 1.532573690505  |
| H | -3.719741585380 | -3.714290896763 | 2.412979228614  |
| H | -4.448187024742 | -2.571268072234 | 1.233304649696  |
| H | 1.550158642971  | -7.140872266111 | 0.900806312352  |
| H | 2.220881916485  | -5.629308881496 | 0.203173218604  |
| H | 1.444595783600  | -5.614598507511 | 1.813661623119  |
| H | 6.218049757391  | -5.004485759112 | 1.042051490433  |
| H | 6.386763486958  | -3.238793042922 | 1.197815139562  |
| H | 4.973554348363  | -4.074253963576 | 1.916665049172  |
| H | 7.595681365822  | 1.041689198963  | -0.928789027828 |
| H | 5.975850202683  | 1.331239744801  | -1.621690697692 |
| H | 6.228707693640  | 1.506445960513  | 0.131273524160  |
| H | -4.697632145966 | -1.105323359795 | -1.477299118210 |
| H | -7.098911266019 | -1.704016362490 | -1.562736561303 |
| H | -8.001800999711 | 1.543258705016  | 1.103082078139  |
| H | -5.618848027913 | 2.139325360618  | 1.194873767669  |
| H | -9.548379623973 | 0.098110297331  | 0.205495717745  |

## On the role of metal d orbital in the Suzuki-Miyaura reaction: “free base” vs. Ni complex

Assuming that in the Suzuki-Miyaura reaction the oxidative addition on the Pd involves both HOMO and/or LUMO of the porphyrazine and the carbon atom bearing the bromine, from the DFT calculations appears that the metal d orbitals give only a marginal contribution (see picture below) to those two. In fact, in the Ni-complex and “free base” the overall composition of both orbitals on the involved carbon atom are very similar.

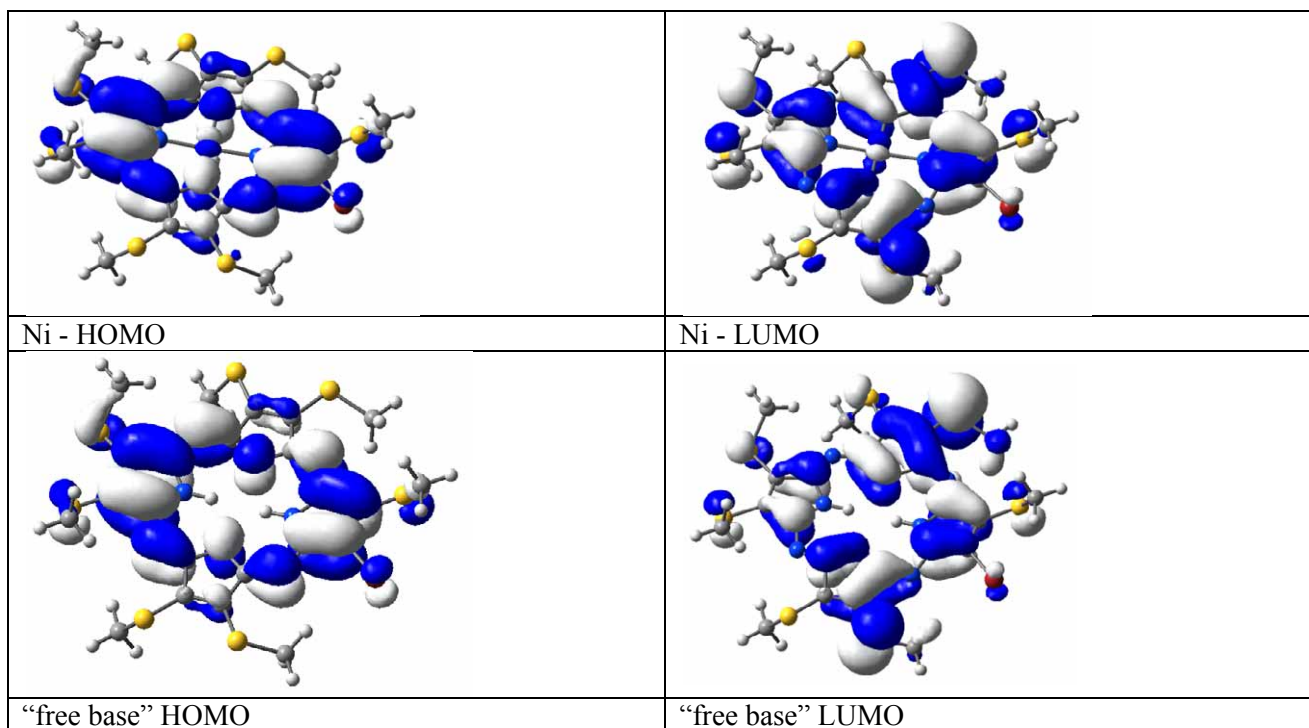

Furthermore, the Mulliken charges for the involved carbon atom are 0.018 and 0.010 |e| for “free base” and Ni complex, respectively. This is a marginal difference compared to the strongly negative charges (in the range of  $-0.130 \div -0.180|e|$ ) of all the remaining  $\beta$ -carbon atoms of the pyrrole moieties in both molecules.

Moreover, assuming  $^{13}\text{C}$  NMR chemical shifts as a good probe of the carbon atom net charge, the  $^{13}\text{C}$  NMR spectra of **1a** and of its metal complexes Ni-**1a** have been recorded to reveal the relative electron density on the  $\alpha$ - and  $\beta$ - tetrapyrrole carbon atoms. Such spectra (see Figures S29 and S30 in ESI) show that the  $\beta$ -Carbon atoms chemical shifts are only slightly affected by the presence of the metal, confirming the DFT findings.

All these observations coincide to suggest that the different behaviour of the “free bases” and the corresponding Ni-complexes cannot be ascribed to the role of the metal d orbitals. On the other hand, an effect due to the partial ionization of the two hydrogen atoms in the macrocycle cavity of the “free base” in the basic conditions of the cross-coupling reactions cannot be ruled out.

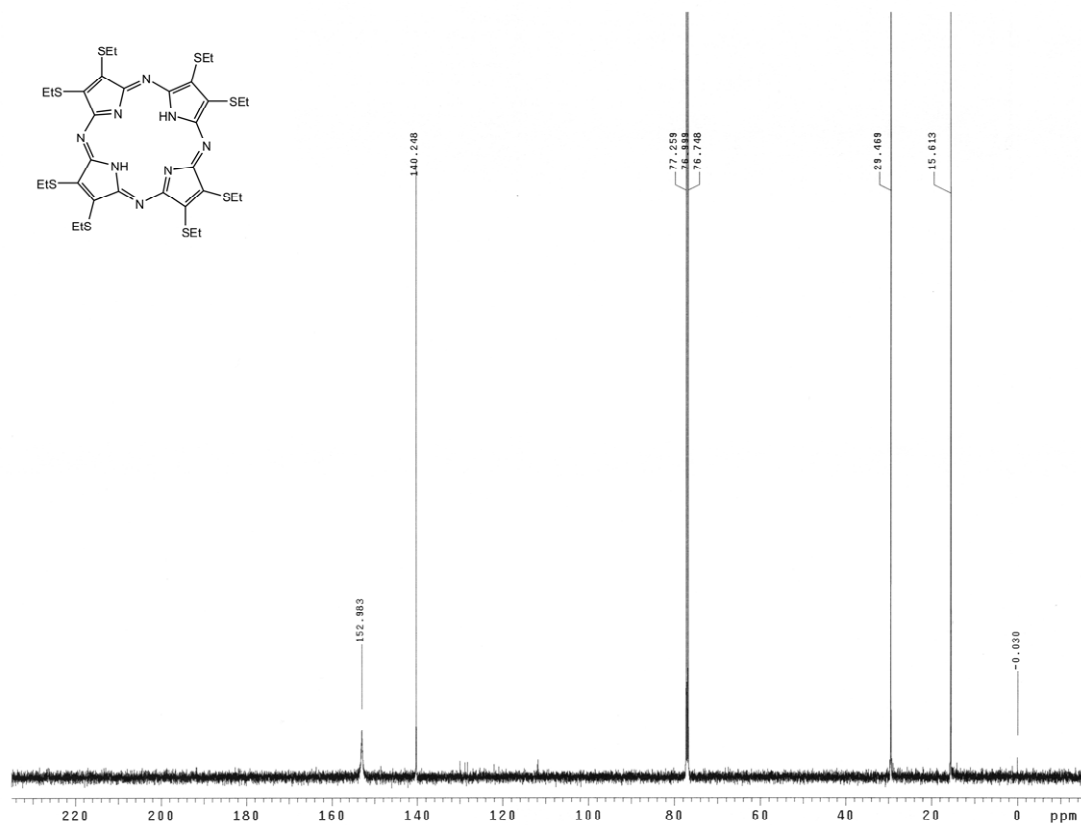

**Figure S29.** <sup>1</sup>H NMR spectrum of compound **1a**.

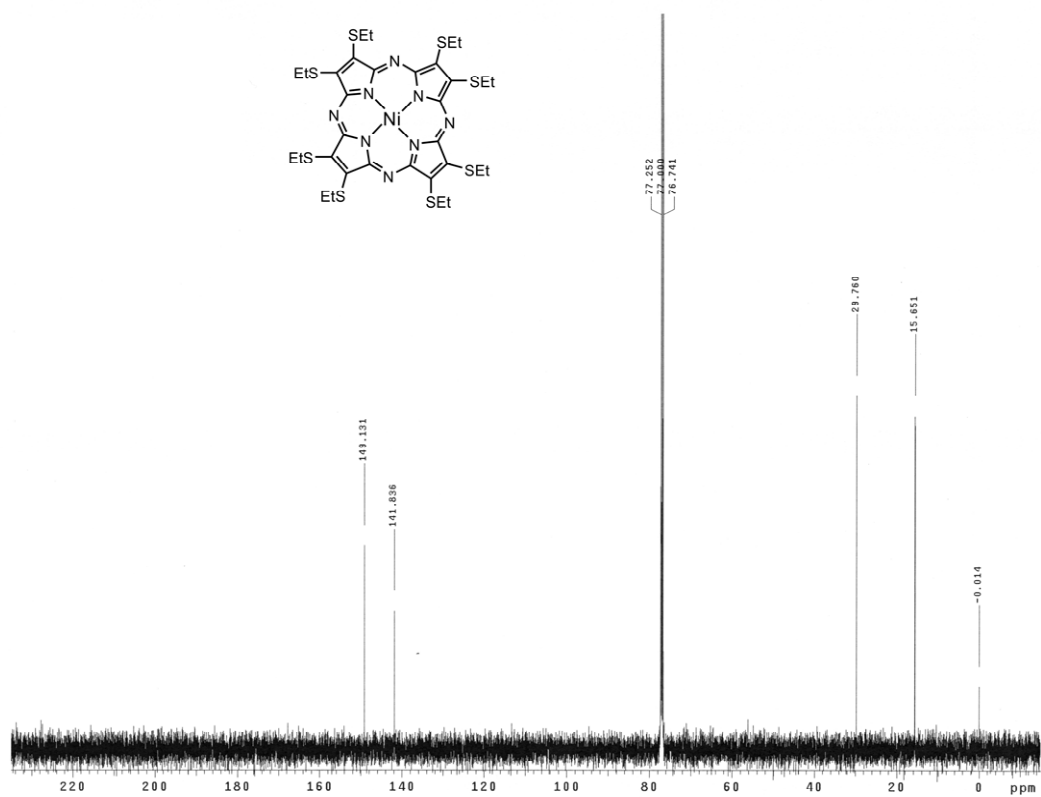

**Figure S30.** <sup>1</sup>H NMR spectrum of compound **Ni-1a**.
